# Supplementary material for: Intracytoplasmic sperm injection (ICSI) versus conventional in vitro fertilisation (IVF) in couples with non-severe male infertility (NSMI-ICSI): protocol for a multicentre randomised controlled trial
Source: PubMed Central journal article supplement — BMJ Open. 2019 Sep 30;9(9):e030366. doi: 10.1136/bmjopen-2019-030366 (PMC6773417; doi:10.1136/bmjopen-2019-030366), 2019-09-30
Supplement: bmjopen-2019-030366.draft_revisions.pdf [file bmjopen-2019-030366.draft_revisions.pdf]

# BMJ Open

BMJ Open is committed to open peer review. As part of this commitment we make the peer review history of every article we publish publicly available.

When an article is published we post the peer reviewers' comments and the authors' responses online. We also post the versions of the paper that were used during peer review. These are the versions that the peer review comments apply to.

The versions of the paper that follow are the versions that were submitted during the peer review process. They are not the versions of record or the final published versions. They should not be cited or distributed as the published version of this manuscript.

BMJ Open is an open access journal and the full, final, typeset and author-corrected version of record of the manuscript is available on our site with no access controls, subscription charges or pay-per-view fees (<http://bmjopen.bmj.com>).

If you have any questions on BMJ Open's open peer review process please email [info.bmjopen@bmj.com](mailto:info.bmjopen@bmj.com)

# BMJ Open

## Intracytoplasmic sperm injection (ICSI) versus conventional in vitro fertilization (IVF) in couples with non-severe male infertility (NSMI-ICSI): protocol for a multi-center randomized controlled trial

|                               |                                                                                                                                                                                                                                                                                                                                                                                                                                                                                                                                                                                                                                                                                                                                                                                                                                                                                                                            |
|-------------------------------|----------------------------------------------------------------------------------------------------------------------------------------------------------------------------------------------------------------------------------------------------------------------------------------------------------------------------------------------------------------------------------------------------------------------------------------------------------------------------------------------------------------------------------------------------------------------------------------------------------------------------------------------------------------------------------------------------------------------------------------------------------------------------------------------------------------------------------------------------------------------------------------------------------------------------|
| Journal:                      | <i>BMJ Open</i>                                                                                                                                                                                                                                                                                                                                                                                                                                                                                                                                                                                                                                                                                                                                                                                                                                                                                                            |
| Manuscript ID                 | bmjopen-2019-030366                                                                                                                                                                                                                                                                                                                                                                                                                                                                                                                                                                                                                                                                                                                                                                                                                                                                                                        |
| Article Type:                 | Protocol                                                                                                                                                                                                                                                                                                                                                                                                                                                                                                                                                                                                                                                                                                                                                                                                                                                                                                                   |
| Date Submitted by the Author: | 11-Mar-2019                                                                                                                                                                                                                                                                                                                                                                                                                                                                                                                                                                                                                                                                                                                                                                                                                                                                                                                |
| Complete List of Authors:     | Zheng, Danni; Peking University Third Hospital<br>Zeng, Lin; Peking University Third Hospital<br>Yang, Rui; Peking University Third Hospital<br>Lian, Ying; Peking University Third Hospital<br>Zhu, Yimin<br>Liang, Xiaoyan; Sun Yat-sen University Sixth Affiliated Hospital, Reproductive Medicine Center<br>Tang, Li; Kunming Medical University First Affiliated Hospital<br>Wang, Huichun; Haidian Maternal and Child Health Hospital<br>Wang, Rui; Robinson Research Institute and Adelaide Medical School, The University of Adelaide, Adelaide, Australia , ; The University of Adelaide<br>Mol, Ben; School of Medicine, Monash University, Melbourne, Australia, OB/GYN<br>Rong, LI; Peking University Third Hospital, OB & GYN<br>Huang, He-Feng; International Peace Maternity and Child Health Hospital, School of Medicine, Shanghai Jiao Tong University, ;<br>Qiao, Jie; Peking University Third Hospital |
| Keywords:                     | In vitro fertilization, Intracytoplasmic sperm injection, Non-severe male infertility, Assisted reproductive technology                                                                                                                                                                                                                                                                                                                                                                                                                                                                                                                                                                                                                                                                                                                                                                                                    |
|                               |                                                                                                                                                                                                                                                                                                                                                                                                                                                                                                                                                                                                                                                                                                                                                                                                                                                                                                                            |

SCHOLARONE™  
Manuscripts

**Title**

Intracytoplasmic sperm injection (ICSI) versus conventional in vitro fertilization (IVF) in couples with non-severe male infertility (NSMI-ICSI): protocol for a multi-center randomized controlled trial

**Authors:**

Danni Zheng<sup>1,2,3,4,5,6,15</sup>, Lin Zeng<sup>7,15</sup>, Rui Yang<sup>1,2,3,4,5,6,15</sup>, Ying Lian<sup>1,2,3,4,5,6</sup>, Yi-Min Zhu<sup>8</sup>, Xiaoyan Liang<sup>9</sup>, Li Tang<sup>10</sup>, Huichun Wang<sup>11</sup>, Rui Wang<sup>12,13</sup>, Ben Willem Mol<sup>13</sup>, Rong Li<sup>1,2,3,4,5,6</sup>, He-Feng Huang<sup>14,16,\*</sup>, and Jie Qiao<sup>1,2,3,4,5,6,16,\*</sup>

<sup>1</sup>Center for Reproductive Medicine, Department of Obstetrics and Gynecology, Peking University Third Hospital, Beijing 100191, China; <sup>2</sup>National Clinical Research Center for Obstetrics and Gynecology, Beijing 100191, China; <sup>3</sup>Key Laboratory of Assisted Reproduction (Peking University), Ministry of Education, Beijing 100191, China; <sup>4</sup>Beijing Key Laboratory of Reproductive Endocrinology and Assisted Reproductive Technology, Beijing 100191, China; <sup>5</sup>Beijing Advanced Innovation Center for Genomics, Beijing 100871, China; <sup>6</sup>Peking-Tsinghua Center for Life Sciences, Peking University, Beijing 100871; <sup>7</sup> Research Center of Clinical Epidemiology, Peking University Third Hospital, Beijing 100191, China; <sup>8</sup>Women's Hospital, Zhejiang University School of Medicine, Hangzhou 310006, China; <sup>9</sup> Reproductive Medicine Center of The Sixth Affiliated Hospital of Sun Yat-Sen University, Guangzhou 510620, China; <sup>10</sup>First Affiliated Hospital of Kunming Medical University, Kunming 650032, China; <sup>11</sup>Haidian Maternal and Child Health Hospital, Beijing 100080, China; <sup>12</sup>Robinson Research Institute and Adelaide Medical School, Adelaide, Australia; <sup>13</sup>Department of Obstetrics and Gynaecology, Monash University, Monash Medical Centre, Australia; <sup>14</sup>The International Peace Maternity and Child Health Hospital, School of Medicine, Shanghai Jiao Tong University, Shanghai 200030, China; <sup>15</sup>Co-first authors; <sup>16</sup>Co-corresponding authors.

**\*Correspondence address**

**Jie Qiao:** Center for Reproductive Medicine, Department of Obstetrics and Gynecology, Peking University Third Hospital, No.49 North Huayuan Road, Haidian District, Beijing 100191, China. Tel: +86-010-82265080; Fax: +86-010-82266849; E-mail: [jie.qiao@263.net](mailto:jie.qiao@263.net).

**He-Feng Huang:** The International Peace Maternity and Child Health Hospital, School of Medicine, Shanghai Jiao Tong University, 910 Hengshan Road, Shanghai 200030, China. Tel: +86-21-64070434;

Fax: +86-21-64070434; E-mail: [huanghefg@hotmail.com](mailto:huanghefg@hotmail.com).

For peer review only

1  
2  
3  
4  
5  
6  
7  
8  
9  
10  
11  
12  
13  
14  
15  
16  
17  
18  
19  
20  
21  
22  
23  
24  
25  
26  
27  
28  
29  
30  
31  
32  
33  
34  
35  
36  
37  
38  
39  
40  
41  
42  
43  
44  
45  
46  
47  
48  
49  
50  
51  
52  
53  
54  
55  
56  
57  
58  
59  
60

## Abstracts

**Introduction:** Intracytoplasmic sperm injection (ICSI), originally introduced as add-on to in vitro fertilization (IVF) for couples with severe male infertility, is in current clinical practice also used in couples with mild male or even unexplained infertility. However, ICSI has involved unresolved concerns regarding the selection and damage to gametes and the health conditions of the offspring, and it is also labour intensive and therefore more expensive than conventional IVF. High quality well powered randomized clinical trials (RCTs) comparing ICSI and IVF are lacking.

**Methods and analysis:** We propose a multicenter, open-label RCT in six reproductive medical centers across China. We will study couples with non-severe male infertility scheduled for their first or second ICSI or IVF cycle, as low fertility rate after fertilization are more frequent in this population, which could lead to controversy about ICSI or conventional IVF for fertilization. On the day of oocyte retrieval, eligible participants will after informed consent be randomized to undergo either ICSI or conventional IVF in a 1:1 treatment ratio. Other standard assisted reproductive treatments are similar and parallel between two groups. Our primary outcome is ongoing pregnancy leading to live birth after the first cycle with embryo transfer. To demonstrate or refute a difference of 7% between ICSI and conventional IVF, we need to include 2,346 women (1,173 in each intervention arm). In addition, we will follow up neonatal outcomes after delivery to identify the influence of ICSI on offspring.

**Ethics and dissemination:** Ethical approval was obtained from Peking University Third Hospital medical science research ethics committee. The findings will be disseminated to the public through conference presentations and peer-reviewed scientific journals.

**Trial registration number:** NCT03298633

### Strengths and limitations of this study

- It's the first randomized controlled clinical trial with a large sample size in 6 centers across China.
- Range of sperm parameters in our study is extended based on the fifth edition of WHO manual for the examination and processing of human semen, which will be applicable to couples with non-severe male infertility as many as possible.
- Results in this study will provide evidence on whether conventional ICSI or IVF is the better method for fertilization in terms of live birth for non-severe male infertility.

**Keywords:** In vitro fertilization; Intracytoplasmic sperm injection; Non-severe male infertility; Assisted reproductive technology.

## Introduction

Male infertility is caused by impaired sperm production and function due to different congenital or acquired factors,<sup>1</sup> and has been estimated to be associated with approximately 30% of infertility.<sup>2,3</sup> Assisted reproductive technology (ART) is perceived as a more successful treatment.<sup>4,5</sup> Originally applied in women with tubal damage in 1970s, in-vitro fertilization (IVF) is now acknowledged as an effective treatment for infertility as a major component of ART.<sup>6</sup> However, conventional IVF was much less effective when the semen characteristics were grossly below the standard values according to the WHO fourth edition sperm parameter values and when fertilization rate in previous cycles was low.<sup>7,8</sup>

In 1992,<sup>9</sup> intracytoplasmic sperm injection (ICSI), a technique where a single spermatozoon was injected mechanically into an oocyte in vitro to achieve fertilization, was introduced. While complete fertilization failure was reported up to 50% of the conventional IVF treatments for couples with moderate male infertility (moderate oligozoospermia, asthenozoospermia and teratozoospermia), this occurred in less than 3% of the couples undergoing ICSI.<sup>10-13</sup> Consequently, ICSI has been applied worldwide to treat severe male infertility.<sup>14-16</sup>

The high success rate of ICSI has resulted in its increased use in other populations for whom conventional IVF may be an option, particularly non-male factor infertility. In Europe, in 2012 ICSI was used in 69% of IVF cycles compared to 35% in 1997, while in the Middle East, South-America and South-East Asia, ICSI is performed in 100% of IVF cycles even in some regions.<sup>17,18</sup> In the USA, between 1996 and 2012, the use of ICSI in IVF cycles has increased from 34% to 76%. The greatest increase was documented in non-male factor infertility, where the use of ICSI went from 15% to 67% during this time period.<sup>19</sup>

There are concerns on the increased use of ICSI, as ICSI is time consuming, expensive, and involves unresolved concerns regarding the damage to gametes and the health conditions of the offspring.<sup>20-24</sup> Many studies have indicated the routine use of ICSI in non-male factors infertility was not recommended to improve the clinical outcomes.<sup>25-28</sup> For non-severe male factor infertility, including mild and moderate oligospermia with or without asthenospermia, the fertilization and pregnancy outcome after ICSI compared with conventional IVF is unclear. Studies randomizing sibling oocytes have shown conflicting results. Several studies have documented higher fertilization rates and lower rates of fertilization failure in these couples undergoing ICSI.<sup>29-31</sup> Other studies did not support the

1  
2  
3  
4 benefit of ICSI in prevention of total fertilization failure as there were no significant differences  
5 between ICSI and conventional IVF in embryo quality, implantation, clinical pregnancy, or live birth  
6 rates.<sup>32-34</sup> These studies have limitations such as small sample size, non-randomized couples, or no  
7 evaluation of live births. In addition, fewer application of ICSI in China may result in low fertility rate  
8 for patients with non-severe male infertility, which would give raise to controversy about ICSI or  
9 conventional IVF for fertilization during ART in these population.<sup>35</sup>

10  
11  
12  
13  
14  
15 In view of this situation, we plan an adequately powered multi-center randomized controlled clinical  
16 trial to assess whether ICSI is more effective than IVF in couples with non-severe male infertility.  
17  
18  
19

## 20 21 **Methods and analysis**

### 22 23 24 *Study design*

25  
26 We plan a multi-center, parallel, open-label, randomized controlled clinical trial (1:1 treatment ratio).  
27  
28 The flow chart followed SPIRIT checklist showing enrollment, allocation, treatment, and follow-up of  
29 participants is presented in [Figure 1](#).<sup>36</sup> In addition, the schedule of enrollment, interventions, and  
30 assessments during the study period is shown in [Table 1](#).  
31  
32  
33  
34  
35  
36  
37  
38  
39  
40  
41  
42  
43  
44  
45  
46  
47  
48  
49  
50  
51  
52  
53  
54  
55  
56  
57  
58  
59  
60

**Table 1.** Schedule of enrollment, interventions, and assessments.

|                      | Study Period                    |                                     |                                  |                            |                          |                           |                               |                             |
|----------------------|---------------------------------|-------------------------------------|----------------------------------|----------------------------|--------------------------|---------------------------|-------------------------------|-----------------------------|
|                      | Enrollment                      | Pre-allocation                      | Allocation                       | Post-allocation            |                          |                           |                               | Close-out                   |
| Content              | Screening & Baseline assessment | Controlled ovarian hyperstimulation | Oocyte retrieval & Randomization | Assessment of embryo       | Embryo transfer          | Evaluation of pregnancy   | Follow-up of pregnancy        |                             |
| Time point           | T <sub>0</sub><br>-3 month      | T <sub>1</sub><br>-1 month          | T <sub>2</sub><br>0 month        | T <sub>3</sub><br>1-3 days | T <sub>4</sub><br>3 days | T <sub>5</sub><br>1 month | T <sub>6</sub><br>3-10 months | T <sub>7</sub><br>12 months |
| <b>Enrollment</b>    |                                 |                                     |                                  |                            |                          |                           |                               |                             |
| Eligibility screen   | ×                               | ×                                   | ×                                |                            |                          |                           |                               |                             |
| Informed consent     | ×                               |                                     |                                  |                            |                          |                           |                               |                             |
| Allocation           |                                 |                                     | ×                                |                            |                          |                           |                               |                             |
| <b>Interventions</b> |                                 |                                     |                                  |                            |                          |                           |                               |                             |
| ICSI                 |                                 |                                     | ×                                |                            |                          |                           |                               |                             |
| Conventional IVF     |                                 |                                     | ×                                |                            |                          |                           |                               |                             |
| <b>Assessments</b>   |                                 |                                     |                                  |                            |                          |                           |                               |                             |
| Baseline data        | ×                               |                                     |                                  |                            |                          |                           |                               |                             |
| Laboratory tests     | ×                               | ×                                   | ×                                |                            | ×                        | ×                         | ×                             | ×                           |
| Fertilization        |                                 |                                     |                                  | ×                          |                          |                           |                               |                             |
| Embryo quality       |                                 |                                     |                                  | ×                          |                          |                           |                               |                             |
| Pregnancy tests      |                                 |                                     |                                  |                            |                          | ×                         |                               |                             |
| Pregnancy outcomes   |                                 |                                     |                                  |                            |                          |                           | ×                             | ×                           |
| Fetus information    |                                 |                                     |                                  |                            |                          |                           | ×                             | ×                           |



1  
2  
3  
4  
5  
6  
7  
8  
9  
10  
11  
12  
13  
14  
15  
16  
17  
18  
19  
20  
21  
22  
23  
24  
25  
26  
27  
28  
29  
30  
31  
32  
33  
34  
35  
36  
37  
38  
39  
40  
41  
42  
43  
44  
45  
46

|                     |  |   |   |  |   |   |   |   |
|---------------------|--|---|---|--|---|---|---|---|
| Neonate information |  |   |   |  |   |   | × | × |
| Safety assessment   |  | × | × |  | × | × | × | × |

For peer review only

### ***Study setting***

The study will recruit participants from 6 reproductive medical centers across China: Peking University Third Hospital, International Peace Maternity and Child Health Hospital of Shanghai Jiao Tong University, Women's Hospital of Zhejiang University, The Sixth Affiliated Hospital of Sun Yat-Sen University, First Affiliated Hospital of Kunming Medical University, and Haidian Maternal and Child Health Hospital. This trial had been reviewed and approved by the medical science research ethics committee of Peking University Third Hospital: D2017050. The study is registered on ClinicalTrials.gov as NCT03298633. Informed consent will be obtained from each participant before randomization. The researchers will permit trial-related monitoring, audits, regulatory inspections, providing direct access to source data and documents.

An independent data and safety monitoring board (DSMB), with members with clinical and statistical expertise, will monitor the trial progress and interim results at regular intervals.

### ***Eligibility criteria***

Couples presenting to reproductive medical center of the involved hospitals will be screened for following eligibility to be enrolled in our trial.

#### **Inclusion Criteria:**

- Infertile couples scheduled for their first or second IVF/ICSI cycle.
- Male partner has non-severe male infertility, defined as a semen concentrate  $5-15 \times 10^6/\text{ml}$  or sperm with progressive motility (type a+b) 10-32%.
- Women received either gonadotrophin-releasing hormone agonist protocol or gonadotrophin-releasing hormone antagonist protocol as their controlled ovarian hyperstimulation treatment.
- Informed consent obtained.

#### **Exclusion criteria:**

- Couple with a contraindication for IVF or ICSI, including poorly controlled type 1 or type 2 diabetes mellitus; undiagnosed liver disease or dysfunction (based on serum liver enzyme test results); renal disease or abnormal serum renal function; anemia; history of deep venous thrombosis, pulmonary embolus or cerebrovascular accident; uncontrolled hypertension or known symptomatic heart disease; history of (or suspected) cervical carcinoma, endometrial carcinoma or breast carcinoma; and unexplained colporrhagia.
- Couples receiving donor sperm or donor eggs.
- Couples undergoing preimplantation genetic testing.

- 1
- 2
- 3 - Sperm concentration with progressive motility used for insemination  $<0.1 \times 10^6/\text{ml}$  on the day
- 4 of oocyte retrieval.
- 5
- 6 - Women with 0 oocyte retrieved.
- 7
- 8 - Using frozen semen.
- 9
- 10 - Poor fertilization in previous cycle ( $\leq 25\%$ ).
- 11

12 The sperm parameters defining non-severe male infertility are evaluated according to the WHO fifth  
13 edition sperm parameter values and the sperm parameters are subject to the latest sperm analysis.<sup>37</sup>  
14 Participants have the right to decline participation during the whole process, and they can withdraw  
15 their consent at any time. Their consent or refusal to consent will not affect their conventional clinical  
16 treatments.  
17  
18  
19

### 20 21 22 **Recruitment**

23 Infertile couples who come to the outpatient clinic or medical record of infertile couples who have  
24 received COH treatment will be screened by a dedicated research team. Eligible couples will then,  
25 before oocyte retrieval, explained by a member of the research team the trial details. After this  
26 information, couples will be offered time for consideration to decide whether to participate in the trial.  
27 Couples who agree to participate will be asked to sign the consent form in their next scheduled visit.  
28 An individual record of all non-recruited patients and reasons for exclusion will be obtained and stored.  
29 On the day of oocyte retrieval, semen of patients who have signed consent form will be analysed again  
30 for the exclusion criteria. Ineligible patients will be further excluded from our trial, continuing their  
31 conventional clinical procedures instead.  
32  
33  
34  
35  
36  
37  
38  
39

### 40 41 **Randomization**

42 Randomization and allocation of eligible patients to study groups will be performed on the day of  
43 oocyte retrieval. This procedure will be performed by administrative staffs in the trial center not  
44 involved in the treatment procedure, using an online trial system with a computer-generated  
45 randomization list that allocates couples in a 1:1 ratio to ICSI or IVF, with a variable block size of 4  
46 or 6 stratified for center. Stratified permuted block randomization will be centrally controlled.  
47  
48  
49  
50  
51

### 52 53 **Blinding**

54 The trial was originally designed and performed as a double-blind trial, in which participants and  
55 clinicians/nurses who performed embryo transfer or follow-up, as well as the investigators and  
56 assessors will be blinded until the primary outcome occurred, while embryologists who performed IVF  
57 and ICSI were not blinded. Recruitment was slow due to the double-blind design, as participants  
58  
59  
60

1  
2  
3 wanted to know about their allocation of fertilization method as soon as possible. Therefore, after  
4 recruitment of 115 participants, the design has been changed to an open-label study, in which  
5 researchers and clinicians are informed about the randomized allocation on the day of embryo transfer  
6 for participants with fresh embryo transfers and the day of embryo freezing for couples with freeze-all  
7 strategies. Prior to these dates, participants and clinicians will still be unaware of randomization  
8 allocation.  
9  
10  
11  
12  
13

## 14 ***Interventions***

### 15 *Controlled ovarian hyperstimulation*

16  
17 All couples will receive controlled ovarian hyperstimulation (COH) treatment, which is performed by  
18 standard routine according to each study center. The COH treatment includes either gonadotrophin-  
19 releasing hormone agonist (GnRH-a) protocol or gonadotrophin-releasing hormone antagonist  
20 (GnRH-ant) protocol, and the selection of protocol will be done by physicians. In the GnRH-ant  
21 protocol, participants will be injected Gonadotropin (Gonal-F<sup>®</sup> or Pouliquen<sup>®</sup> or HMG<sup>®</sup>) daily from  
22 cycle day 2 or 3. When at least one follicle has reached a diameter of 12mm or on day 6 of ovarian  
23 stimulation, GnRH-ant (Cetrotide<sup>®</sup> or Ganirelix<sup>®</sup>) will be administered subcutaneously until the trigger  
24 day (include the trigger day). For super long GnRH-a protocol, GnRH-a (Alarelin<sup>®</sup> or Triptorelin<sup>®</sup>)  
25 will be used in previous menstrual cycle, gonadotropin treatment starts after 28-35 days on GnRH  
26 agonist downregulation. For long GnRH-a protocol, pituitary down-regulation will be initiated 7-10  
27 days before the menstrual cycle with GnRH-a (Alarelin<sup>®</sup> or Triptorelin<sup>®</sup>). After 10-14 days or on day  
28 2 of menstrual cycle, gonadotropin treatment will start. For short GnRH-a protocol, participants will  
29 receive Alarelin<sup>®</sup> or Triptorelin<sup>®</sup> for the pituitary down-regulation on day 2/3 of menstrual cycle.  
30 Gonadotropin will be used on the same time. For above treatments, menstrual cycle of patient includes  
31 spontaneous menstrual cycle, and irregular menstrual cycle by the use of oral contraceptives (OC) or  
32 progestins. Before gonadotrophin treatment, baseline pelvic ultrasound, as well as basic serum  
33 hormones (such as FSH, luteinizing hormone (LH), progesterone (P) and  $\beta$ -hCG) will be measured to  
34 confirm the follicle status. The initial dosage gonadotropin (Gonal-F<sup>®</sup> or Pouliquen<sup>®</sup> or HMG<sup>®</sup>) is  
35 150-300mg/d and the subsequent dose will be adjusted according to the individual response.  
36 Gonadotrophin treatment will be continued to the trigger day. After two or more follicles reach a  
37 diameter  $\geq 18$  mm, 250ug of hCG (Ovitrelle, 250  $\mu$ g s.c.) will be once injected on trigger day.  
38  
39  
40  
41  
42  
43  
44  
45  
46  
47  
48  
49  
50  
51  
52  
53  
54  
55

### 56 *Oocyte retrieval and preparation*

1  
2  
3 Oocyte retrieval is scheduled for 36h ( $\pm 2$ ) after hCG injection. Routine oocyte pick-up is performed  
4 under transvaginal ultrasound guidance via 17G oocyte aspiration needle with use of intravenous  
5 sedation.  
6  
7  
8  
9

### 10 *Semen preparation*

11 Fresh ejaculate semen samples will be obtained by masturbation after 2-7 days' abstention from sexual  
12 intercourse on the day of oocyte retrieval. Sperm concentration and progressive motility are assessed  
13 by computer-assisted semen analysis according to the fifth edition of World Health Organization  
14 (WHO) laboratory standards of human semen and sperm.<sup>37</sup> All semen samples are prepared by  
15 discontinue density gradient centrifugation or swim-up protocol according to local routines.  
16  
17  
18  
19  
20  
21

### 22 *ICSI Group*

23 Oocytes in couples allocated to ICSI, will undergo ICSI as been previously described.<sup>38</sup> In short, as  
24 the enzymatic removal was done in oocyte preparation, the denuded oocytes are examined to assess  
25 integrity and maturity. Only those oocytes that have extruded the first polar body (metaphase- II  
26 oocytes) will be microinjected.  
27  
28  
29  
30  
31

### 32 *IVF Group*

33 All the oocytes in couples allocated to IVF will be treated by conventional IVF, in which every oocyte  
34 will be inseminated by sperm with progressive motility concentrate  $0.1-0.2 \times 10^6$  approximately 39-42h  
35 after hCG injection.  
36  
37  
38  
39  
40

### 41 *Assessment of fertilization and embryo quality*

42 Apart from the fertilization procedure, assisted reproductive treatments will be similar for the two  
43 groups. Assessment of fertilization is carried out about 16-18h (day 1) after fertilization. After the  
44 evaluation on day 1, zygotes are left in culture for a further 48 hours, and the cleavage embryo quality  
45 will be observed at 67-69 (day 3) hours after fertilization. The embryos are scored according to the  
46 quality, numbers, size of the blastomeres and the amount of anucleate fragmentation.  
47  
48  
49  
50  
51

### 52 *Embryo transfer and luteal support*

53 Fresh or frozen-thawed embryo transfer will be decided and performed by physicians in three or five  
54 days following the day of oocytes collection for participants receive fresh embryo transfer, and 4-6  
55 day after progesterone initiation for participants undergo frozen thawed embryo transfer (within 6  
56  
57  
58  
59  
60

1  
2  
3 months after oocyte aspiration). To reduce the risk of high-order multiple pregnancies, the number of  
4 embryos replaced will be mostly limited to two best-quality embryos. Luteal support, as well as  
5 embryo freezing and thawing is performed by standard routines at each study center, as we assume  
6 that the different protocols will be equally distributed in the interventional and control groups.  
7  
8  
9

### 10 11 *Follow-up*

12  
13 Urine and blood hCG will be measured 14 days after embryo transfer, and positive results indicate  
14 biochemical pregnancy. If the gestational sac is observed with ultrasonography on 7 weeks after  
15 transfer, clinical pregnancy will be confirmed. Ongoing pregnancy is defined by the presence of a  
16 gestational sac with fetal heartbeat after 12 weeks of gestation. Women with confirmed as ongoing  
17 pregnancy will be asked to notify researchers the time of delivery. In 2 weeks after delivery, the  
18 information of pregnancy (pregnancy complications, and fetus information), delivery information  
19 (gestational age, delivery mode, placenta abnormality and/or delivery complications), infant  
20 information (such as sex, birth weight, birth defect) will be collected by completing forms designed  
21 for this visit.  
22  
23  
24  
25  
26  
27  
28  
29

### 30 31 **Outcome measures**

#### 32 Primary outcome

33  
34 Our primary outcome will be ongoing pregnancy leading to live birth after the first cycle with embryo  
35 transfer. Live birth will be defined as a delivery of one or more living infants ( $\geq 22$  week's gestation or  
36 birth weight more than 1,000g).<sup>17</sup>  
37  
38  
39

#### 40 41 Secondary outcomes

42  
43 For the effectiveness of the treatment, we will record these secondary outcomes in terms of  
44 effectiveness:  
45

- 46 • Fertilization: defined as number of zygotes with 2PN (per oocyte retrieved and per oocyte  
47 inseminated/injected).
- 48 • Total fertilization failure: defined as no oocyte formed 2PN in this given cycle.
- 49 • Available embryo: defined as number of embryos  $\geq 4$  cells and  $\leq 30\%$  fragmentation (except  
50 embryos developed from  $\geq 3$ PN zygotes) on day 3 observation.
- 51 • Good quality embryo: defined as number of embryos with  $\geq 6$  cells and  $\leq 10\%$  fragmentation  
52 developed from 2PN zygotes on day 3 observation.
- 53 • Implantation: defined as the number of gestational sacs observed per embryo transferred.  
54  
55  
56  
57  
58  
59  
60

- Clinical pregnancy: defined as one or more observed gestational sac or definitive clinical signs of pregnancy under ultrasonography at 7 weeks after embryo transfer (including clinically documented ectopic pregnancy).
- Multiple pregnancy: defined as a pregnancy with two or more gestational sacs or positive heart beats at 7 weeks of gestation.
- Ongoing pregnancy: defined as the presence of a gestational sac and fetal heartbeat after 12 weeks of gestation.

For the safety of the treatment, we will record the following treatment complications as secondary outcomes:

- Moderate/severe ovarian hyperstimulation syndrome (OHSS): defined as exaggerated systemic response to ovarian stimulation characterized by a wide spectrum of clinical and laboratory manifestations. It is classified as mild, moderate, or severe according to the degree of abdominal distention, ovarian enlargement, and respiratory, hemodynamic, and metabolic complications.
- Miscarriage: defined as the spontaneous loss of an intra-uterine pregnancy prior to 22 completed weeks of gestational age.
- Ectopic pregnancy: defined as the implantation takes place outside the uterine cavity, confirmed by sonography or laparoscopy.

We will also collect the following obstetric and perinatal complications:

- Gestational diabetes mellitus (GDM).
- Hypertensive disorders of pregnancy (comprising pregnancy induced hypertension (PIH); pre-eclampsia (PET) and eclampsia).
- Antepartum haemorrhage, including placenta previa, placenta accreta and unexplained.
- Preterm birth: defined as birth of a fetus delivered after 28 and before 37 completed weeks of gestational age in participants confirmed ongoing pregnancy.
- Birth weight, including low birth weight (defined as weight < 2500 gm at birth), very low birth weight (defined as < 1500 gm at birth), high birth weight (defined as >4000 gm at birth) and very high birth weight (defined as >4500 gm at birth).
- Large for gestational age (defined as birth weight >90th centile for gestation, based on standardized ethnicity based charts) and small for gestational age (defined as less than 10th centile for gestational age at delivery based on standardized ethnicity based charts).
- Congenital anomaly (any congenital anomaly will be included).

- Perinatal mortality: defined as fetal or neonatal death occurring during late pregnancy (at 28 completed weeks of gestational age and later), during childbirth, or up to seven completed days after birth.

### Data management

The data collected for the trial will be a mixture of routinely clinical data and information from follow-up, which are verifiable from the medical record or telephone interview. To guarantee the authentic study results, all of our researchers and clinicians are required to master all details about this study. All the characteristics in our study are collected at baseline and follow-up through a standard clinical electronic data collection system (EDC). All participant-identifiable data, such as consent forms, screening and identification logs will be stored in the investigator site files, accessible only to delegated members of the study team.

Safety reporting will be in accordance with plan and all adverse events will be recorded and informed DSMB. The DSMB will perform an interim analysis three months after the first 600 randomized participants have completed embryo transfer. They will do so using the endpoint ongoing pregnancy, as data on live birth will not be available. Also, the DSMB will oversee the SAE's that have occurred.

### Sample size

Among couples with non-severe male infertility, the average live birth rate after IVF during 2014-2015 calculated over all study sites was 40% per cycle. Based on other studies within fertility care as well as the discussion by gynaecologist and methodologists, we assumed that the minimal clinical important difference to make ICSI preferable over IVF would be 7%. To demonstrate this difference with two-sided test, 5% alpha-error, 90% statistical power, and taking consideration a dropout of 10%, we will need to enroll 1,173 participants in each group, i.e. a total of 2,346 participants (the ratio between groups will be 1:1). For the interim analysis, we will use the Haybittle-Peto boundary. The significance level for the interim analysis will be 0.001 and for the final analysis 0.05.<sup>39</sup>

### Statistical analysis

For continues variables, parameters normally distributed will be expressed as mean with standard deviation (SD) and compared using student t-test. If the parameters are non-normally distributed, their medians and inter-quantile ranges (IRQs) will be reported, the Mann-Whitney-U test will be utilized to test the distribution of these variables as well. For categorical variables, we will present the proportion between each group and distributions will be compared using Pearson's chi-square test and Fisher's exact test when appropriate. Data analysis of this trial will follow intention-to-treatment, in



1  
2  
3 which all randomized women will be considered in the primary comparison between treatment groups.  
4 Per-protocol analysis will be conducted as a secondary analysis in participants who complied with  
5 protocol and per-treatment analysis will be used according to actual treatments that participants  
6 received. For missing values, a range of clinically plausible scenarios will be used to impute missing  
7 values in order to test the robustness of the findings. For losses to follow-up and protocol violations,  
8 we will attempt sensitive analyses to explore the effect of these factors on the trial findings. All tests  
9 will be two-tailed, and differences with p value <0.001 for interim analysis or p value <0.05 for final  
10 analysis are considered statistically significant. All statistical analyses will be performed with the SAS  
11 software package V.9.4. The statistical analysis will be done by an independent statistician, overseen  
12 by Clinical Epidemiology Research Center of Peking University Third Hospital. The analysis will be  
13 described in detail in a statistical analysis plan.  
14  
15  
16  
17  
18  
19  
20  
21  
22  
23

### 24 **Ethics and dissemination**

25 This trial had been reviewed and approved by the medical science research ethics committee of Peking  
26 University Third Hospital: D2017050. The study is registered on ClinicalTrials.gov as NCT03298633.  
27 Informed consent will be obtained from each participant before randomisation. The researchers will  
28 permit trial-related monitoring, audits, regulatory inspections, providing direct access to source data  
29 and documents.  
30  
31  
32  
33  
34  
35

### 36 **Trial status**

37 The recruitment in each study center started in April 2018. The estimated end date of the last  
38 recruitment for this study is April 2020.  
39  
40  
41  
42

### 43 **Authors' contributions**

44 JQ, HH, RL, RW and BWM conceived the study idea. JQ, HH, RL, RY, YL, DZ, participated in the  
45 design of the study, recruitment of participants, and drafting of the manuscript. DZ and RY participate  
46 in recruitment of participants and assessment of clinical outcomes. HH, YZ, XL, LT, and HW  
47 supervised patient diagnosis and recruitment in each study center. DZ and LZ coordinates of the data  
48 collection. LZ oversees data collection will performed data analysis. DZ, LZ, RW and BWM will  
49 design the statistical analysis plan and oversee statistical analysis. YL oversees laboratory work among  
50 6 centers. All authors critically reviewed the article and approved the final manuscript.  
51  
52  
53  
54  
55  
56  
57  
58  
59  
60

1  
2  
3 **Funding statement**  
4

5 This study was supported by National Key Research and Development Program of China  
6 (2016YFC1000201; 2018YFC1002104) and the National Science Foundation of China (81730038).  
7

8 The study funders had no role in the study design, implementation, analysis, manuscript, preparation,  
9 or decision to submit this article for publication.  
10  
11  
12

13 **Competing interests statement**  
14

15 None declared. Completed disclosure of interests form available to view online as supporting  
16 information.  
17  
18  
19  
20  
21  
22  
23  
24  
25  
26  
27  
28  
29  
30  
31  
32  
33  
34  
35  
36  
37  
38  
39  
40  
41  
42  
43  
44  
45  
46  
47  
48  
49  
50  
51  
52  
53  
54  
55  
56  
57  
58  
59  
60

For peer review only

## Reference

1. Krausz C. Male infertility: pathogenesis and clinical diagnosis. *Best Pract Res Clin Endocrinol Metab* 2011;25:271-85.
2. Hull MG, Glazener CM, Kelly NJ, et al. Population study of causes, treatment, and outcome of infertility. *Br Med J (Clin Res Ed)* 1985;291:1693-97.
3. Crosignani PG, Walters DE. Clinical pregnancy and male subfertility; the ESHRE multicentre trial on the treatment of male subfertility. European Society of Human Reproduction and Embryology. *Hum Reprod* 1994;9:1112-18.
4. O'Donovan PA, Vandekerckhove P, Lilford RJ, et al. Treatment of male infertility: is it effective? Review and meta-analyses of published randomized controlled trials. *Hum Reprod* 1993;8:1209-22.
5. Tournaye H. Male factor infertility and ART. *Asian J Androl* 2012;14:103-08.
6. Cohen J, Fehilly CB, Fishel SB, et al. Male infertility successfully treated by in-vitro fertilisation. *Lancet* 1984;1:1239-40.
7. Fishel S, Aslam I, Lisi F, et al. Should ICSI be the treatment of choice for all cases of in-vitro conception? *Hum Reprod* 2000;15:1278-83.
8. Devroey P, Van Steirteghem A. A review of ten years experience of ICSI. *Hum Reprod Update* 2004;10:19-28.
9. Palermo G, Joris H, Devroey P, et al. Pregnancies after intracytoplasmic injection of single spermatozoon into an oocyte. *Lancet* 1992;340:17-18.
10. Coates TE, Check JH, Choe J, et al. An evaluation of couples with failure of fertilization in vitro. *Hum Reprod* 1992;7:978-81.
11. Aboulghar MA, Mansour RT, Serour GI, et al. Management of long-standing unexplained infertility: A prospective study. *Am J Obstet Gynecol* 1999;181:371-75.
12. Fan W, Li SW, Li L, et al. Outcome of conventional IVF and ICSI on sibling oocytes in the case of isolated teratozoospermia. *J Assist Reprod Genet* 2012;29:905-10.
13. Xie BG, Zhu WJ, Huang YH. Outcome of conventional IVF and ICSI on sibling oocytes in moderate ligoasthenozoospermia. *Pak J Med Sci* 2013;29:1221-24.
14. Palermo G, Joris H, Derde MP, et al. Sperm characteristics and outcome of human assisted fertilization by subzonal insemination and intracytoplasmic sperm injection. *Fertil Steril* 1993;59:826-35.
15. Verheyen G, Tournaye H, Staessen C, et al. Controlled comparison of conventional in-vitro fertilization and intracytoplasmic sperm injection in patients with asthenozoospermia. *Hum Reprod* 1999;14:2313-19.
16. Payne D, Flaherty SP, Jeffrey R, et al. Successful treatment of severe male factor infertility in 100 consecutive cycles using intracytoplasmic sperm injection. *Hum Reprod* 1994;9:2051-57.
17. Zegers-Hochschild F, Adamson GD, Dyer S, et al. The International Glossary on Infertility and Fertility Care, 2017. *Fertil Steril* 2017;108:393-406.
18. Dyer S, Chambers GM, de Mouzon J, et al. International Committee for Monitoring Assisted Reproductive Technologies world report: Assisted Reproductive Technology 2008, 2009 and 2010. *Hum Reprod* 2016;31:1588-609.
19. Boulet SL, Mehta A, Kissin DM, et al. Trends in use of and reproductive outcomes associated with intracytoplasmic sperm injection. *JAMA* 2015;313:255-63.
20. Blake M, Garrisi J, Tomkin G, et al. Sperm deposition site during ICSI affects fertilization and development. *Fertil Steril* 2000;73:31-37.
21. Terada Y, Luetjens CM, Sutovsky P, et al. Atypical decondensation of the sperm nucleus, delayed replication of the male genome, and sex chromosome positioning following intracytoplasmic human sperm injection (ICSI) into golden hamster eggs: does ICSI itself introduce chromosomal anomalies? *Fertil Steril* 2000;74:454-60.
22. Miller JE, Smith TT. The effect of intracytoplasmic sperm injection and semen parameters on blastocyst development in vitro. *Hum Reprod* 2001;16:918-24.
23. Lie RT, Lyngstadaas A, Orstavik KH, et al. Birth defects in children conceived by ICSI compared with children conceived by other IVF-methods; a meta-analysis. *Int J Epidemiol* 2005;34:696-701.
24. Wen J, Jiang J, Ding C, et al. Birth defects in children conceived by in vitro fertilization and intracytoplasmic sperm injection: a meta-analysis. *Fertil Steril* 2012;97:1331-37.
25. Eftekhari M, Mohammadian F, Yousefnejad F, et al. Comparison of conventional IVF versus ICSI in non-male factor, normoresponder patients. *Iran J Reprod Med* 2012;10:131-36.
26. Kim JY, Kim JH, Jee BC, et al. Can intracytoplasmic sperm injection prevent total fertilization failure and enhance embryo quality in patients with non-male factor infertility? *Eur J Obstet Gynecol Reprod Biol* 2014;178:188-91.

- 1  
2  
3 27. Park JH, Jee BC, Kim SH. Comparison of normal and abnormal fertilization of in vitro-matured human oocyte  
4 according to insemination method. *J Obstet Gynaecol Res* 2016;42:417-21.
- 5 28. Tannus S, Son WY, Gilman A, et al. The role of intracytoplasmic sperm injection in non-male factor infertility  
6 in advanced maternal age. *Hum Reprod* 2017;32:119-24.
- 7 29. Pisarska MD, Casson PR, Cisneros PL, et al. Fertilization after standard in vitro fertilization versus  
8 intracytoplasmic sperm injection in subfertile males using sibling oocytes. *Fertil Steril* 1999;71:627-32.
- 9 30. Elizur SE, Levron J, Seidman DS, et al. Conventional in vitro fertilization versus intracytoplasmic sperm  
10 injection for sibling oocytes in couples with mild oligoteratoasthenozoospermia and couples with normal sperm.  
11 *Fertil Steril* 2004;82:241-43.
- 12 31. van der Westerlaken L, Naaktgeboren N, Verburg H, et al. Conventional in vitro fertilization versus  
13 intracytoplasmic sperm injection in patients with borderline semen: a randomized study using sibling oocytes. *Fertil*  
14 *Steril* 2006;85:395-400.
- 15 32. Hamberger L, Sjogren A, Lundin K, et al. Microfertilization techniques--the Swedish experience. *Reprod Fertil*  
16 *Dev* 1995;7:263-67, 268.
- 17 33. Bhattacharya S, Hamilton MP, Shaaban M, et al. Conventional in-vitro fertilisation versus intracytoplasmic  
18 sperm injection for the treatment of non-male-factor infertility: a randomised controlled trial. *Lancet* 2001;357:2075-  
19 79.
- 20 34. Hershlag A, Paine T, Kvapil G, et al. In vitro fertilization-intracytoplasmic sperm injection split: an insemination  
21 method to prevent fertilization failure. *Fertil Steril* 2002;77:229-32.
- 22 35. Qiao J, Feng HL. Assisted reproductive technology in China: compliance and non-compliance. *Transl Pediatr*  
23 2014;3:91-97.
- 24 36. Chan A, Tetzlaff JM, Altman DG, et al. SPIRIT 2013 Statement: Defining Standard Protocol Items for Clinical  
25 Trials. *Ann Intern Med* 2013;158:200.
- 26 37. Organization WH: WHO Manual for the Examination and Processing of Human Semen. Geneva, 2010,
- 27 38. Oehninger S, Veeck L, Lanzendorf S, et al. Intracytoplasmic sperm injection: achievement of high pregnancy  
28 rates in couples with severe male factor infertility is dependent primarily upon female and not male factors. *Fertil*  
29 *Steril* 1995;64:977-81.
- 30 39. Blenkinsop A, Parmar MK, Choodari-Oskooei B. Assessing the impact of efficacy stopping rules on the error  
31 rates under the multi-arm multi-stage framework. *Clin Trials* 2019:1496049025.
- 32  
33  
34  
35  
36  
37  
38  
39  
40  
41  
42  
43  
44  
45  
46  
47  
48  
49  
50  
51  
52  
53  
54  
55  
56  
57  
58  
59  
60

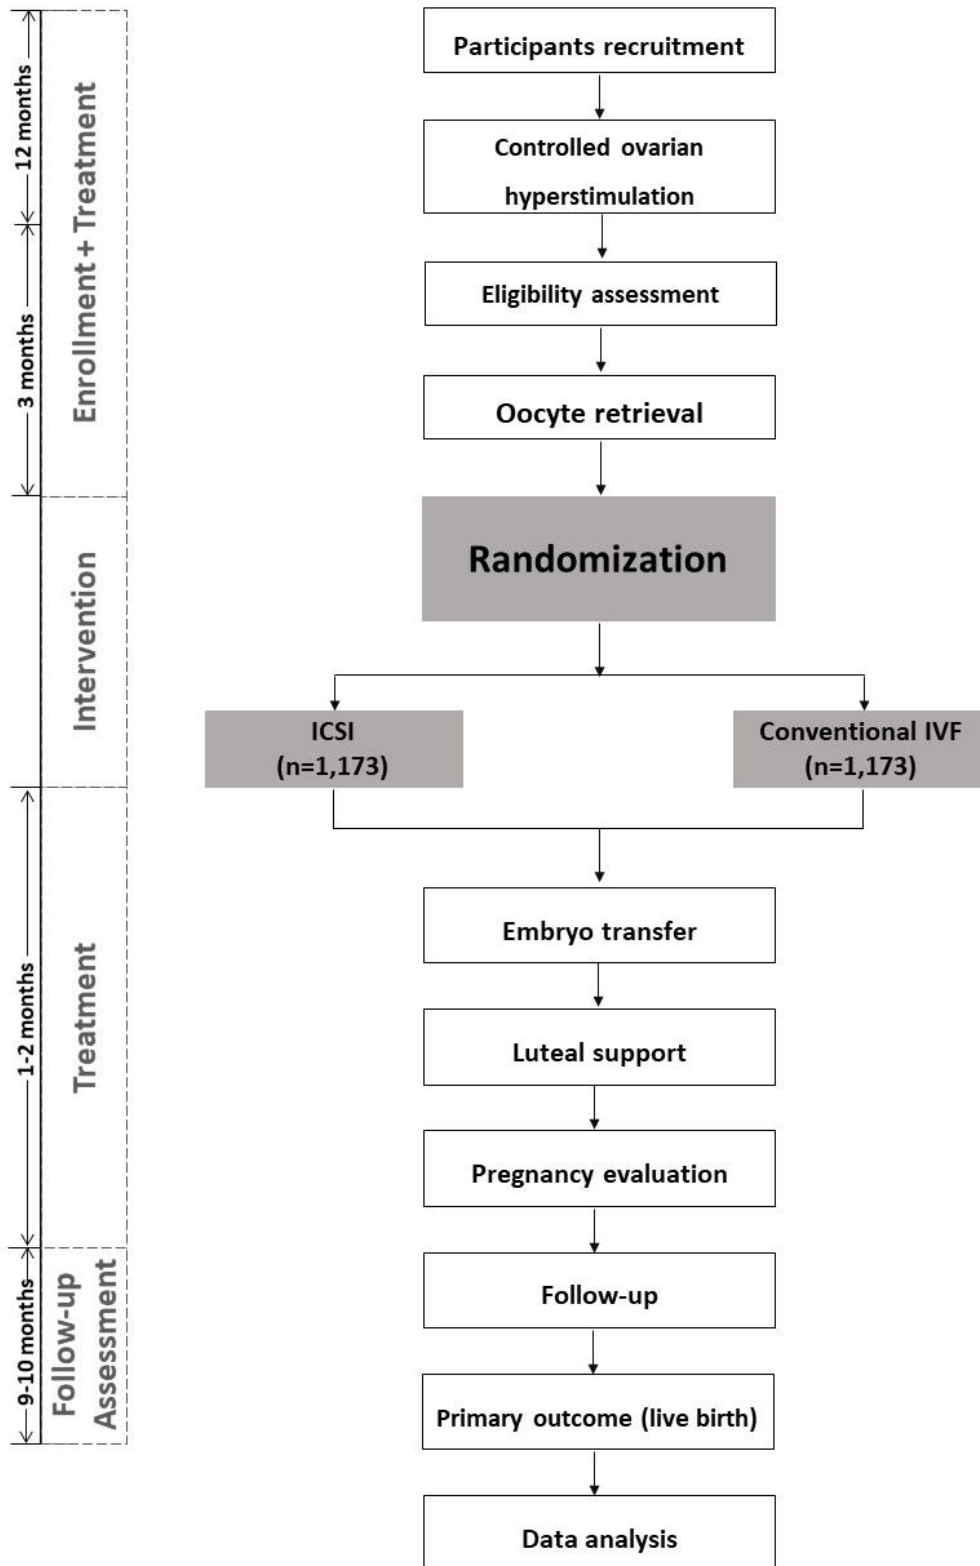

**Figure 1.** Flow chart followed SPIRIT checklist showing participants enrollment, allocation, treatment, and follow-up of participants.

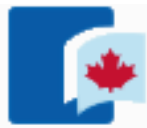

Published in final edited form as:

*Ann Intern Med.* 2013 February 5; 158(3): 200–207. doi:10.7326/0003-4819-158-3-201302050-00583.

Requests for Single Reprints: An-Wen Chan, MD, DPhil, Women's College Research Institute, Women's College Hospital, University of Toronto, 790 Bay Street, Toronto, Ontario M5G 1N8, Canada; anwen.chan@utoronto.ca.

**Current Author Addresses:** Dr. Chan: Women's College Research Institute, Women's College Hospital, University of Toronto, 790 Bay Street, Toronto, Ontario M5G 1N8, Canada.

Ms. Tetzlaff: Ottawa Methods Centre, Clinical Epidemiology Program, Ottawa Hospital Research Institute, 501 Smyth Road, Ottawa, Ontario K1H 8L6, Canada.

Dr. Altman: Centre for Statistics in Medicine, University of Oxford, Wolfson College Annexe, Linton Road, Oxford OX2 6UD, United Kingdom.

Dr. Laupacis: Keenan Research Centre at the Li Ka Shing Knowledge Institute of St. Michael's Hospital, 30 Bond Street, Toronto, Ontario M5B 1W8, Canada.

Drs. Gøtzsche and Hróbjartsson: Nordic Cochrane Centre, Rigshospitalet Department 3343, Blegdamsvej 9, 2100 Copenhagen Ø, Denmark.

Dr. Krleža-Jeri : Department of Epidemiology and Community Medicine, University of Ottawa, 451 Smyth Road, Ottawa, Ontario K1H 8M5, Canada.

Dr. Mann: Division of Medical Ethics and Humanities, University of Utah School of Medicine, 75 South 2000 East #108, Salt Lake City, UT 84132.

Dr. Dickersin: Center for Clinical Trials, Johns Hopkins Bloomberg School of Public Health, 615 North Wolfe Street, Mail Room W5010, Baltimore, MD 21205.

Dr. Berlin: Janssen Research & Development, Janssen Pharmaceutical Companies of Johnson & Johnson, 1125 Trenton Harbourton Road, Titusville, NJ 08560.

Ms. Doré: UK Medical Research Council Clinical Trials Unit, 125 Kingsway, London WC2B 6NH, United Kingdom.

Dr. Parulekar: NCIC Clinical Trials Group, Cancer Research Institute, Queen's University, 10 Stuart Street, Kingston, Ontario K7L 3N6, Canada.

Dr. Summerskill: *The Lancet*, 32 Jamestown Road, London NW1 7BY, United Kingdom.

Dr. Groves: *BMJ*, BMA House, Tavistock Square, London WC1H 9JP, United Kingdom.

Dr. Schulz: Quantitative Sciences, FHI 360, Research Triangle Park, 2224 East NC Highway 54, Durham, NC 27713.

Dr. Sox: The Dartmouth Institute for Health Policy and Clinical Practice, The Geisel School of Medicine at Dartmouth, HB 7500, Hanover, NH 03755.

Dr. Rockhold: GlaxoSmithKline, 5 Moore Drive, PO Box 13398, Research Triangle Park, NC 27709.

Dr. Rennie: The Philip R. Lee Institute for Health Policy Studies, University of California, San Francisco, 3333 California Street, Laurel Heights 265, San Francisco, CA 94143-0936.

Dr. Moher: Clinical Epidemiology Program, Ottawa Hospital Research Institute, Department of Epidemiology and Community Medicine, University of Ottawa, 501 Smyth Road, Ottawa, Ontario K1H 8L6, Canada.

**Disclaimer:** Dr. Krleža-Jeri was formerly employed by the Canadian Institutes of Health Research (Knowledge Translation Branch), and Dr. Parulekar is affiliated with the NCIC Clinical Trials Group. The funders otherwise had no input into the design and conduct of the project; collection, management, analysis, and interpretation of the data; and preparation, review, or approval of the manuscript.

Dr. Berlin is employed by the Janssen Pharmaceutical Companies of Johnson & Johnson, Dr. Sox is Editor Emeritus of *Annals of Internal Medicine*, and Dr. Rockhold is employed by GlaxoSmithKline.

**Potential Conflicts of Interest:** Disclosures can be viewed at [www.acponline.org/authors/icmje/ConflictOfInterestForms.do?msNum=M12-1905](http://www.acponline.org/authors/icmje/ConflictOfInterestForms.do?msNum=M12-1905).

**Author Contributions:** Conception and design: A.-W. Chan, J.M. Tetzlaff, D.G. Altman, A. Laupacis, P.C. Gøtzsche, K. Krleža-Jeri, A. Hróbjartsson, H. Mann, K. Dickersin, J.A. Berlin, W.R. Parulekar, K.F. Schulz, H.C. Sox, D. Rennie, D. Moher.

Analysis and interpretation of the data: A.-W. Chan, J.M. Tetzlaff, D.G. Altman, A. Laupacis, P.C. Gøtzsche, K. Krleža-Jeri, A. Hróbjartsson, K. Dickersin, C.J. Doré, W.R. Parulekar, T. Groves, K.F. Schulz, F.W. Rockhold, D. Rennie, D. Moher.

Drafting of the article: A.-W. Chan, J.M. Tetzlaff, P.C. Gøtzsche, H. Mann, K. Dickersin, J.A. Berlin, C.J. Doré, W.R. Parulekar, K.F. Schulz.

Critical revision of the article for important intellectual content: A.-W. Chan, J.M. Tetzlaff, D.G. Altman, A. Laupacis, K. Krleža-Jeri, A. Hróbjartsson, H. Mann, K. Dickersin, J.A. Berlin, C.J. Doré, W.R. Parulekar, W.S.M. Summerskill, T. Groves, K.F. Schulz, H.C. Sox, F.W. Rockhold, D. Rennie, D. Moher.

Final approval of the article: A.-W. Chan, J.M. Tetzlaff, D.G. Altman, A. Laupacis, P.C. Gøtzsche, K. Krleža-Jeri, A. Hróbjartsson, H. Mann, K. Dickersin, J.A. Berlin, C.J. Doré, W.R. Parulekar, W.S.M. Summer-skill, T. Groves, K.F. Schulz, H.C. Sox, F.W. Rockhold, D. Rennie, D. Moher.

Provision of study materials or patients: K. Krleža-Jeri, K. Dickersin.

Statistical expertise: D.G. Altman, P.C. Gøtzsche, C.J. Doré, K.F. Schulz, F.W. Rockhold.

Obtaining of funding: A.-W. Chan, A. Laupacis, D. Moher.

Administrative, technical, or logistic support: A.-W. Chan, P.C. Gøtzsche, K. Krleža-Jeri.

Collection and assembly of data: A.-W. Chan, J.M. Tetzlaff, P.C. Gøtzsche, A. Hróbjartsson, K. Dickersin, C.J. Doré, W.R. Parulekar, K.F. Schulz.

## SPIRIT 2013 Statement: Defining Standard Protocol Items for Clinical Trials

An-Wen Chan, MD, DPhil, Jennifer M. Tetzlaff, MSc, Douglas G. Altman, DSc, Andreas Laupacis, MD, Peter C. Gøtzsche, MD, DrMedSci, Karmela Krleža-Jeri, MD, DSc, Asbjørn Hróbjartsson, PhD, Howard Mann, MD, Kay Dickersin, PhD, Jesse A. Berlin, ScD, Caroline J. Doré, BSc, Wendy R. Parulekar, MD, William S.M. Summerskill, MBBS, Trish Groves, MBBS, Kenneth F. Schulz, PhD, Harold C. Sox, MD, Frank W. Rockhold, PhD, Drummond Rennie, MD, and David Moher, PhD

Women's College Research Institute, Women's College Hospital, and Keenan Research Centre at the Li Ka Shing Knowledge Institute of St. Michael's Hospital, University of Toronto, Toronto, Ontario, Canada; Ottawa Methods Centre, Ottawa Hospital Research Institute, Ethics Office, Canadian Institutes of Health Research, and University of Ottawa, Ottawa, Ontario, Canada; Centre for Statistics in Medicine, University of Oxford, Oxford, United Kingdom; Nordic Cochrane Centre, Rigshospitalet, Copenhagen, Denmark; University of Utah School of Medicine, Salt Lake City, Utah; Center for Clinical Trials, Johns Hopkins Bloomberg School of Public Health, Baltimore, Maryland; Janssen Research & Development, Janssen Pharmaceutical Companies of Johnson & Johnson, Titusville, New Jersey; UK Medical Research Council Clinical Trials Unit, *The Lancet*, and *BMJ*, London, United Kingdom; NCIC Clinical Trials Group, Cancer Research Institute, Queen's University, Kingston, Ontario, Canada; Quantitative Sciences, FHI 360, and GlaxoSmithKline, Research Triangle Park, North Carolina; The Dartmouth Institute for Health Policy and Clinical Practice, The Geisel School of Medicine at Dartmouth, Hanover, New Hampshire; The PR Lee Institute for Health Policy Studies, University of California, San Francisco, San Francisco, California

### Abstract

The protocol of a clinical trial serves as the foundation for study planning, conduct, reporting, and appraisal. However, trial protocols and existing protocol guidelines vary greatly in content and quality. This article describes the systematic development and scope of SPIRIT (Standard Protocol Items: Recommendations for Interventional Trials) 2013, a guideline for the minimum content of a clinical trial protocol.

The 33-item SPIRIT checklist applies to protocols for all clinical trials and focuses on content rather than format. The checklist recommends a full description of what is planned; it does not prescribe how to design or conduct a trial. By providing guidance for key content, the SPIRIT recommendations aim to facilitate the drafting of high-quality protocols. Adherence to SPIRIT would also enhance the transparency and completeness of trial protocols for the benefit of investigators, trial participants, patients, sponsors, funders, research ethics committees or institutional review boards, peer reviewers, journals, trial registries, policymakers, regulators, and other key stakeholders.

---

The protocol of a clinical trial plays a key role in study planning, conduct, interpretation, oversight, and external review by detailing the plans from ethics approval to dissemination

*Ann Intern Med.* Author manuscript; available in PMC 2016 November 17.

1  
2  
3  
4  
5  
6  
7  
8  
9  
10  
11  
12  
13  
14  
15  
16  
17  
18  
19  
20  
21  
22  
23  
24  
25  
26  
27  
28  
29  
30  
31  
32  
33  
34  
35  
36  
37  
38  
39  
40  
41  
42  
43  
44  
45  
46  
47  
48  
49  
50  
51  
52  
53  
54  
55  
56  
57  
58  
59  
60

of results. A well-written protocol facilitates an appropriate assessment of scientific, ethical, and safety issues before a trial begins; consistency and rigor of trial conduct; and full appraisal of the conduct and results after trial completion. The importance of protocols has been emphasized by journal editors (1–6), peer reviewers (7–10), researchers (11–15), and public advocates (16).

Despite the central role of protocols, a systematic review revealed that existing guidelines for protocol content vary greatly in their scope and recommendations, seldom describe how the guidelines were developed, and rarely cite broad stakeholder involvement or empirical evidence to support their recommendations (17). These limitations may partly explain why an opportunity exists to improve the quality of protocols. Many protocols for randomized trials do not adequately describe the primary outcomes (inadequate for 25% of trials) (18, 19), treatment allocation methods (inadequate for 54% to 79%) (20, 21), use of blinding (inadequate for 9% to 34%) (21, 22), methods for reporting adverse events (inadequate for 41%) (23), components of sample size calculations (inadequate for 4% to 40%) (21, 24), data analysis plans (inadequate for 20% to 77%) (21, 24–26), publication policies (inadequate for 7%) (27), and roles of sponsors and investigators in study design or data access (inadequate for 89% to 100%) (28, 29). The problems that underlie these protocol deficiencies may in turn lead to avoidable protocol amendments, poor trial conduct, and inadequate reporting in trial publications (15, 30).

In response to these gaps in protocol content and guidance, we launched the SPIRIT (Standard Protocol Items: Recommendations for Interventional Trials) initiative in 2007. This international project aims to improve the completeness of trial protocols by producing evidence-based recommendations for a minimum set of items to be addressed in protocols. The SPIRIT 2013 Statement includes a 33-item checklist (Table 1) and diagram (Figure). An associated explanatory paper (SPIRIT 2013 Explanation and Elaboration) (31) details the rationale and supporting evidence for each checklist item, along with guidance and model examples from actual protocols.

## Development of the SPIRIT 2013 Statement

The SPIRIT 2013 Statement was developed in broad consultation with 115 key stakeholders, including trial investigators ( $n = 30$ ); health care professionals ( $n = 31$ ); methodologists ( $n = 34$ ); statisticians ( $n = 16$ ); trial coordinators ( $n = 14$ ); journal editors ( $n = 15$ ); and representatives from the research ethics community ( $n = 17$ ), industry and nonindustry funders ( $n = 7$ ), and regulatory agencies ( $n = 3$ ), whose roles are not mutually exclusive. As detailed later, the SPIRIT guideline was developed through 2 systematic reviews, a formal Delphi consensus process, 2 face-to-face consensus meetings, and pilot-testing (32).

The SPIRIT checklist evolved through several iterations. The process began with a preliminary checklist of 59 items derived from a systematic review of existing protocol guidelines (17). In 2007, 96 expert panelists from 17 low ( $n = 1$ ), middle- ( $n = 6$ ), and high-income ( $n = 10$ ) countries refined this initial checklist over 3 iterative Delphi consensus survey rounds by e-mail (33). Panelists rated each item on a scale of 1 (not important) to 10 (very important), suggested new items, and provided comments that were circulated in

*Ann Intern Med.* Author manuscript; available in PMC 2016 November 17.



subsequent rounds. Items with a median score of 8 or higher in the final round were included, whereas those rated 5 or lower were excluded. Items rated between 5 and 8 were retained for further discussion at the consensus meetings.

After the Delphi survey, 16 members of the SPIRIT Group (named as authors of this paper) met in December 2007 in Ottawa, Ontario, Canada, and 14 members met in September 2009 in Toronto, Ontario, Canada, to review the survey results, discuss controversial items, and refine the draft checklist. After each meeting, the revised checklist was recirculated to the SPIRIT Group for additional feedback.

A second systematic review identified empirical evidence about the relevance of specific protocol items to trial conduct or risk of bias. The results of this review informed the decision to include or exclude items on the SPIRIT checklist. This review also provided the evidence base of studies cited in the SPIRIT 2013 Explanation and Elaboration paper (31). Some items had little or no identified empirical evidence (for example, the title) and are included in the checklist on the basis of a strong pragmatic or ethical rationale.

Finally, we pilot-tested the draft checklist in 2010 and 2011 with University of Toronto graduate students who used the document to develop trial protocols as part of a master's-level course on clinical trial methods. Their feedback on the content, format, and usefulness of the checklist was obtained through an anonymous survey and incorporated into the final SPIRIT checklist.

## Definition of a Clinical Trial Protocol

Although every study requires a protocol, the precise definition of a protocol varies among individual investigators, sponsors, and other stakeholders. For the SPIRIT initiative, the protocol is defined as a document that provides sufficient detail to enable understanding of the background, rationale, objectives, study population, interventions, methods, statistical analyses, ethical considerations, dissemination plans, and administration of the trial; replication of key aspects of trial methods and conduct; and appraisal of the trial's scientific and ethical rigor from ethics approval to dissemination of results.

The protocol is more than a list of items. It should be a cohesive document that provides appropriate context and narrative to fully understand the elements of the trial. For example, the description of a complex intervention may need to include training materials and figures to enable replication by persons with appropriate expertise.

The full protocol must be submitted for approval by an institutional review board (IRB) or research ethics committee (34). It is recommended that trial investigators or sponsors address the SPIRIT checklist items in the protocol before submission. If the details for certain items have not yet been finalized, then this should be stated in the protocol and the items updated as they evolve.

The protocol is a "living" document that is often modified during the trial. A transparent audit trail with dates of important changes in trial design and conduct is an essential part of the scientific record. Trial investigators and sponsors are expected to adhere to the protocol

*Ann Intern Med.* Author manuscript; available in PMC 2016 November 17.

1  
2 as approved by the IRB and to document amendments made in the most recent protocol  
3 version. Important protocol amendments should be reported to IRBs and trial registries as  
4 they occur and subsequently be described in trial reports.  
5

## 6 7 **Scope of the SPIRIT 2013 Statement**

8  
9 The SPIRIT 2013 Statement applies to the content of a clinical trial protocol, including its  
10 appendices. A clinical trial is a prospective study in which 1 or more interventions are  
11 assigned to human participants to assess the effects on health-related outcomes. The primary  
12 scope of SPIRIT 2013 relates to randomized trials, but the same considerations substantially  
13 apply to all types of clinical trials, regardless of study design, intervention, or topic.  
14

15  
16 The SPIRIT 2013 Statement provides guidance for minimum protocol content. Certain  
17 circumstances may warrant additional protocol items. For example, a factorial study design  
18 may require specific justification; crossover trials have unique statistical considerations, such  
19 as carryover effects; and industry-sponsored trials may have additional regulatory  
20 requirements.  
21

22  
23 The protocol and its appendices are often the sole repository of detailed information relevant  
24 to every SPIRIT checklist item. Using existing trial protocols, we have been able to identify  
25 model examples of every item (31), which illustrates the feasibility of addressing all  
26 checklist items in a single protocol document. For some trials, relevant details may appear in  
27 related documents, such as statistical analysis plans, case record forms, operations manuals,  
28 or investigator contracts (35, 36). In these instances, the protocol should outline the key  
29 principles and refer to the separate documents so that their existence is known.  
30

31  
32 The SPIRIT 2013 Statement primarily relates to the content of the protocol rather than its  
33 format, which is often subject to local regulations, traditions, or standard operating  
34 procedures. Nevertheless, adherence to certain formatting conventions, such as a table of  
35 contents; section headings; glossary; list of abbreviations; list of references; and a schematic  
36 schedule of enrollment, interventions, and assessments, will facilitate protocol review  
37 (Figure).  
38

39  
40 Finally, the intent of SPIRIT 2013 is to promote transparency and a full description of what  
41 is planned—not to prescribe how a trial should be designed or conducted. The checklist  
42 should not be used to judge trial quality, because the protocol of a poorly designed trial may  
43 address all checklist items by fully describing its inadequate design features. Nevertheless,  
44 the use of SPIRIT 2013 may improve the validity and success of trials by reminding  
45 investigators about important issues to consider during the planning stages.  
46

## 47 48 **Relation to Existing Clinical Trial Guidance**

49  
50 With its systematic development process, consultation with international stakeholders, and  
51 explanatory paper citing relevant empirical evidence (31), SPIRIT 2013 builds on other  
52 international guidance applicable to clinical trial protocols. It adheres to the ethical  
53 principles mandated by the 2008 Declaration of Helsinki, particularly the requirement that  
54 the protocol address specific ethical considerations, such as competing interests (34).  
55

56  
57 *Ann Intern Med.* Author manuscript; available in PMC 2016 November 17.  
58

1  
2  
3  
4  
5  
6  
7  
8  
9  
10  
11  
12  
13  
14  
15  
16  
17  
18  
19  
20  
21  
22  
23  
24  
25  
26  
27  
28  
29  
30  
31  
32  
33  
34  
35  
36  
37  
38  
39  
40  
41  
42  
43  
44  
45  
46  
47  
48  
49  
50  
51  
52  
53  
54  
55  
56  
57  
58  
59  
60

PMc Canada Author Manuscript

In addition, SPIRIT 2013 encompasses the protocol items recommended by the International Conference on Harmonisation Good Clinical Practice **E6 guidance**, written in 1996 for clinical trials whose data are intended for submission to regulatory authorities (37). The SPIRIT Statement builds on the Good Clinical Practice guidance by providing additional recommendations on specific key protocol items (for example, allocation concealment, trial registration, and consent processes). In contrast to SPIRIT, the Good Clinical Practice guidance used informal consensus methods, has unclear contributorship, and lacks citation of supporting empirical evidence (38).

The SPIRIT 2013 Statement also supports **trial registration** requirements from the World Health Organization (39), the International Committee of Medical Journal Editors (40), legislation pertaining to ClinicalTrials.gov (41), the European Commission (42), and others. For example, item 2b of the SPIRIT checklist recommends that the protocol list the World Health Organization Trial Registration Data Set (Appendix Table, available at [www.annals.org](http://www.annals.org)), which is the minimum amount of information that the International Committee of Medical Journal Editors mandates for trial registries. Having this data set in its own protocol section is intended not only to serve as a form of trial summary but also to help improve the quality of information in registry entries. Registration-specific data could be easily identified in the protocol section and copied into the registry fields. In addition, protocol amendments applicable to this section could prompt investigators to update their registry data.

The SPIRIT 2013 Statement mirrors applicable items from CONSORT 2010 (Consolidated Standards of Reporting Trials) (43). Consistent wording and structure used for items common to both checklists will facilitate the transition from a SPIRIT-based protocol to a final report based on CONSORT. The SPIRIT Group has also engaged leaders of other initiatives relevant to protocol standards, such as trial registries, the Clinical Data Interchange Standards Consortium Protocol Representation Group, and Pragmatic Randomized Controlled Trials in Health-Care, to align international efforts in promoting transparency and high-quality protocol content.

## Potential Effect

An extensive range of stakeholders could benefit from widespread use of the SPIRIT 2013 Statement and its explanatory paper (Table 2). Pilot-testing and informal feedback have shown that it is particularly valuable for trial investigators when they draft their protocols. It can also serve as an informational resource for new investigators, peer reviewers, and IRB members.

There is also potential benefit for trial implementation. The excessive delay from the time of protocol development to ethics approval and the start of participant recruitment remains a major concern for clinical trials (44). Improved completeness of protocols could help increase the efficiency of protocol review by reducing avoidable queries to investigators about incomplete or unclear information. With full documentation of key information and increased awareness of important considerations before the trial begins, the use of SPIRIT may also help to reduce the number and burden of subsequent protocol amendments—many

*Ann Intern Med.* Author manuscript; available in PMC 2016 November 17.

of which can be avoided with careful protocol drafting and development (15). Widespread adoption of SPIRIT 2013 as a single standard by IRBs, funding agencies, regulatory agencies, and journals could simplify the work of trial investigators and sponsors, who could fulfill the common application requirements of multiple stakeholders with a single SPIRIT-based protocol. Better protocols would also help trial personnel to implement the study as the protocol authors intended.

Furthermore, adherence to SPIRIT 2013 could help ensure that protocols contain the requisite information for critical appraisal and trial interpretation. High-quality protocols can provide important information about trial methods and conduct that is not available from journals or trial registries (45–47). As a transparent record of the researchers' original intent, comparisons of protocols with final trial reports can help to identify selective reporting of results and undisclosed amendments (48), such as changes to primary outcomes (19, 49). However, clinical trial protocols are not generally accessible to the public (45). The SPIRIT 2013 Statement will have a greater effect when protocols are publicly available to facilitate full evaluation of trial validity and applicability (11, 12, 14, 50).

The SPIRIT 2013 guideline needs the support of key stakeholders to achieve its greatest impact (Table 2), as seen with widely adopted reporting guidelines, such as CONSORT (51). We will post the names of organizations that have endorsed SPIRIT 2013 on the SPIRIT Web site ([www.spirit-statement.org](http://www.spirit-statement.org)) and provide resources to facilitate implementation. Widespread adoption of the SPIRIT recommendations can help improve protocol drafting, content, and implementation; facilitate registration, efficiency, and appraisal of trials; and ultimately enhance transparency for the benefit of patient care.

## Acknowledgments

The authors thank Drs. Mona Loufty and Patricia Parkin for pilot-testing the SPIRIT checklist with their graduate course students. The authors also acknowledge the participation of Dr. Geneviève Dubois-Flynn in the 2009 SPIRIT meeting.

**Grant Support:** Financial support for the SPIRIT meetings was provided by the Canadian Institutes of Health Research (grant DET-106068), National Cancer Institute of Canada (now Canadian Cancer Society Research Institute), and Canadian Agency for Drugs and Technologies in Health. The Canadian Institutes of Health Research has also funded ongoing dissemination activities (grant MET-117434).

## References

1. Rennie D. Trial registration: a great idea switches from ignored to irresistible. *JAMA*. 2004; 292:1359–62. [PubMed: 15355937]
2. Strengthening the credibility of clinical research [Editorial]. *Lancet*. 2010; 375:1225. [PubMed: 20382309]
3. Summerskill W, Collingridge D, Frankish H. Protocols, probity, and publication. *Lancet*. 2009; 373:992. [PubMed: 19304003]
4. Jones G, Abbasi K. Trial protocols at the BMJ [Editorial]. *BMJ*. 2004; 329:1360. [PubMed: 15591544]
5. Groves, T. [on 1 October 2012] Let SPIRIT take you ... towards much clearer trial protocols. *BMJ Group Blogs*. Sep 25. 2009 Accessed at <http://blogs.bmj.com/bmj/2009/09/25/trish-groves-let-spirit-take-you-towards-much-clearer-trial-protocols/>

*Ann Intern Med*. Author manuscript; available in PMC 2016 November 17.

6. Altman DG, Furberg CD, Grimshaw JM, Rothwell PM. Lead editorial: trials-using the opportunities of electronic publishing to improve the reporting of randomised trials [Editorial]. *Trials*. 2006; 7:6. [PubMed: 16556322]
7. Turner EH. A taxpayer-funded clinical trials registry and results database [Editorial]. *PLoS Med*. 2004; 1:e60. [PubMed: 15562322]
8. Coultas D. Ethical considerations in the interpretation and communication of clinical trial results. *Proc Am Thorac Soc*. 2007; 4:194–8. [PubMed: 17494731]
9. Siegel JP. Editorial review of protocols for clinical trials [Letter]. *N Engl J Med*. 1990; 323:1355.
10. Murray GD. Research governance must focus on research training. *BMJ*. 2001; 322:1461–2.
11. Chan A-W. Access to clinical trial data [Editorial]. *BMJ*. 2011; 342:d80. [PubMed: 21228020]
12. Miller JD. Registering clinical trial results: the next step. *JAMA*. 2010; 303:773–4. [PubMed: 20179288]
13. Krleža-Jeri K, Chan A-W, Dickersin K, Sim I, Grimshaw J, Glud C. Principles for international registration of protocol information and results from human trials of health related interventions: Ottawa statement (part 1). *BMJ*. 2005; 330:956–8. [PubMed: 15845980]
14. Lassere M, Johnson K. The power of the protocol. *Lancet*. 2002; 360:1620–2. [PubMed: 12457782]
15. Getz KA, Zuckerman R, Cropp AB, Hindle AL, Krauss R, Kaitin KI. Measuring the incidence, causes, and repercussions of protocol amendments. *Drug Inf J*. 2011; 45:265–75.
16. Public Citizen Health Research Group v. Food and Drug Administration, 964 F Supp. 413 (DDC 1997).
17. Tetzlaff JM, Chan A-W, Kitchen J, Sampson M, Tricco A, Moher D. Guidelines for randomized clinical trial protocol content: a systematic review. *Syst Rev*. 2012; 1:43. [PubMed: 23006870]
18. Chan A-W, Hróbjartsson A, Haahr MT, Gøtzsche PC, Altman DG. Empirical evidence for selective reporting of outcomes in randomized trials: comparison of protocols to published articles. *JAMA*. 2004; 291:2457–65. [PubMed: 15161896]
19. Smyth RM, Kirkham JJ, Jacoby A, Altman DG, Gamble C, Williamson PR. Frequency and reasons for outcome reporting bias in clinical trials: interviews with trialists. *BMJ*. 2011; 342:c7153. [PubMed: 21212122]
20. Pildal J, Chan A-W, Hróbjartsson A, Forfang E, Altman DG, Gøtzsche PC. Comparison of descriptions of allocation concealment in trial protocols and the published reports: cohort study. *BMJ*. 2005; 330:1049. [PubMed: 15817527]
21. Mhaskar R, Djulbegovic B, Magazin A, Soares HP, Kumar A. Published methodological quality of randomized controlled trials does not reflect the actual quality assessed in protocols. *J Clin Epidemiol*. 2012; 65:602–9. [PubMed: 22424985]
22. Hróbjartsson A, Pildal J, Chan A-W, Haahr MT, Altman DG, Gøtzsche PC. Reporting on blinding in trial protocols and corresponding publications was often inadequate but rarely contradictory. *J Clin Epidemiol*. 2009; 62:967–73. [PubMed: 19635403]
23. Scharf O, Colevas AD. Adverse event reporting in publications compared with sponsor database for cancer clinical trials. *J Clin Oncol*. 2006; 24:3933–8. [PubMed: 16921045]
24. Chan A-W, Hróbjartsson A, Jørgensen KJ, Gøtzsche PC, Altman DG. Discrepancies in sample size calculations and data analyses reported in randomised trials: comparison of publications with protocols. *BMJ*. 2008; 337:a2299. [PubMed: 19056791]
25. Al-Marzouki S, Roberts I, Evans S, Marshall T. Selective reporting in clinical trials: analysis of trial protocols accepted by *The Lancet* [Letter]. *Lancet*. 2008; 372:201.
26. Hernández AV, Steyerberg EW, Taylor GS, Marmarou A, Habbema JD, Maas AI. Subgroup analysis and covariate adjustment in randomized clinical trials of traumatic brain injury: a systematic review. *Neurosurgery*. 2005; 57:1244–53. [PubMed: 16331173]
27. Gøtzsche PC, Hróbjartsson A, Johansen HK, Haahr MT, Altman DG, Chan A-W. Constraints on publication rights in industry-initiated clinical trials [Letter]. *JAMA*. 2006; 295:1645–6. [PubMed: 16609085]
28. Gøtzsche PC, Hróbjartsson A, Johansen HK, Haahr MT, Altman DG, Chan A-W. Ghost authorship in industry-initiated randomised trials. *PLoS Med*. 2007; 4:e19. [PubMed: 17227134]

*Ann Intern Med*. Author manuscript; available in PMC 2016 November 17.

- 1  
2  
3  
4  
5  
6  
7  
8  
9  
10  
11  
12  
13  
14  
15  
16  
17  
18  
19  
20  
21  
22  
23  
24  
25  
26  
27  
28  
29  
30  
31  
32  
33  
34  
35  
36  
37  
38  
39  
40  
41  
42  
43  
44  
45  
46  
47  
48  
49  
50  
51  
52  
53  
54  
55  
56  
57  
58  
59  
60
29. Lundh A, Krogsbøll LT, Gøtzsche PC. Access to data in industry-sponsored trials [Letter]. *Lancet*. 2011; 378:1995–6.
30. Hopewell S, Dutton S, Yu LM, Chan A-W, Altman DG. The quality of reports of randomised trials in 2000 and 2006: comparative study of articles indexed in PubMed. *BMJ*. 2010; 340:c723. [PubMed: 20332510]
31. Chan A-W, Tetzlaff JM, Gøtzsche PC, Altman DG, Mann H, Berlin JA, et al. SPIRIT 2013 explanation and elaboration: guidance for protocols of clinical trials. *BMJ*. 2013; 346:e7586. [PubMed: 23303884]
32. Moher D, Schulz KF, Simera I, Altman DG. Guidance for developers of health research reporting guidelines. *PLoS Med*. 2010; 7:e1000217. [PubMed: 20169112]
33. Tetzlaff JM, Moher D, Chan A-W. Developing a guideline for clinical trial protocol content: Delphi consensus survey. *Trials*. 2012; 13:176. [PubMed: 23006145]
34. World Medical Association. [on 1 October 2012] WMA Declaration of Helsinki-Ethical Principles for Medical Research Involving Human Subjects. Accessed at [www.wma.net/en/30publications/10policies/b3/index.html](http://www.wma.net/en/30publications/10policies/b3/index.html)
35. International Conference on Harmonisation. ICH Harmonised Tripartite Guideline: General Considerations for Clinical Trials: E8. International Conference on Harmonisation of Technical Requirements for Registration of Pharmaceuticals for Human Use; 17 July 1997; Accessed at [www.ich.org/fileadmin/Public\\_Web\\_Site/ICH\\_Products/Guidelines/Efficacy/E8/Step4/E8\\_Guideline.pdf](http://www.ich.org/fileadmin/Public_Web_Site/ICH_Products/Guidelines/Efficacy/E8/Step4/E8_Guideline.pdf)
36. International Conference on Harmonisation. ICH Harmonised Tripartite Guideline: Statistical Principles for Clinical Trials: E9. International Conference on Harmonisation of Technical Requirements for Registration of Pharmaceuticals for Human Use; 5 February 1998; Accessed at [www.ich.org/fileadmin/Public\\_Web\\_Site/ICH\\_Products/Guidelines/Efficacy/E9/Step4/E9\\_Guideline.pdf](http://www.ich.org/fileadmin/Public_Web_Site/ICH_Products/Guidelines/Efficacy/E9/Step4/E9_Guideline.pdf)
37. International Conference on Harmonisation. ICH Harmonised Tripartite Guideline: Guideline for Good Clinical Practice: E6. International Conference on Harmonisation of Technical Requirements for Registration of Pharmaceuticals for Human Use; 10 June 1996; Accessed at [www.ich.org/fileadmin/Public\\_Web\\_Site/ICH\\_Products/Guidelines/Efficacy/E6\\_R1/Step4/E6\\_R1\\_Guideline.pdf](http://www.ich.org/fileadmin/Public_Web_Site/ICH_Products/Guidelines/Efficacy/E6_R1/Step4/E6_R1_Guideline.pdf)
38. Grimes DA, Hubacher D, Nanda K, Schulz KF, Moher D, Altman DG. The Good Clinical Practice guideline: a bronze standard for clinical research. *Lancet*. 2005; 366:172–4. [PubMed: 16005342]
39. Sim I, Chan A-W, Gülmezoglu AM, Evans T, Pang T. Clinical trial registration: transparency is the watchword. *Lancet*. 2006; 367:1631–3. [PubMed: 16714166]
40. Laine C, De Angelis C, Delamothe T, Drazen JM, Frizelle FA, Haug C, et al. Clinical trial registration: looking back and moving ahead [Editorial]. *Ann Intern Med*. 2007; 147:275–7. [PubMed: 17548404]
41. Expanded Clinical Trial Registry Data Bank; Food and Drug Administration Amendments Act of 2007, HR 2580, 110th Congress, 1st Sess, Title VIII, §801; 2007. Accessed at [www.govtrack.us/congress/billtext.xpd?bill=h110-3580](http://www.govtrack.us/congress/billtext.xpd?bill=h110-3580)
42. European Commission. Communication from the Commission regarding the guideline on the data fields contained in the clinical trials database provided for in Article 11 of Directive 2001/20/EC to be included in the database on medicinal products provided for in Article 57 of Regulation (EC) No 726/2004 (2008/C 168/02). *Official Journal of the European Union*. 2008; 51:3–4.
43. Schulz KF, Altman DG, Moher D. CONSORT Group. CONSORT 2010 statement: updated guidelines for reporting parallel group randomized trials. *Ann Intern Med*. 2010; 152:726–32. [PubMed: 20335313]
44. National Research Council. *A National Cancer Clinical Trials System for the 21st Century: Reinvigorating the NCI Cooperative Group Program*. Washington, DC: National Academies Pr; 2010.
45. Chan A-W. Out of sight but not out of mind: how to search for unpublished clinical trial evidence. *BMJ*. 2012; 344:d8013. [PubMed: 22214892]

*Ann Intern Med*. Author manuscript; available in PMC 2016 November 17.

- 1  
2  
3  
4  
5  
6  
7  
8  
9  
10  
11  
12  
13  
14  
15  
16  
17  
18  
19  
20  
21  
22  
23  
24  
25  
26  
27  
28  
29  
30  
31  
32  
33  
34  
35  
36  
37  
38  
39  
40  
41  
42  
43  
44  
45  
46  
47  
48  
49  
50  
51  
52  
53  
54  
55  
56  
57  
58  
59  
60
- PMc Canada Author Manuscript
- PMc Canada Author Manuscript
- PMc Canada Author Manuscript
46. Wieseler B, Kerekes MF, Vervoelgyi V, McGauran N, Kaiser T. Impact of document type on reporting quality of clinical drug trials: a comparison of registry reports, clinical study reports, and journal publications. *BMJ*. 2012; 344:d8141. [PubMed: 22214759]
47. Reveiz L, Chan A-W, Krleža-Jeri K, Granados CE, Pinart M, Etxeandia I, et al. Reporting of methodologic information on trial registries for quality assessment: a study of trial records retrieved from the WHO search portal. *PLoS One*. 2010; 5:e12484. [PubMed: 20824212]
48. Dwan K, Altman DG, Cresswell L, Blundell M, Gamble CL, Williamson PR. Comparison of protocols and registry entries to published reports for randomised controlled trials. *Cochrane Database Syst Rev*. 2011:MR000031. [PubMed: 21249714]
49. Dwan K, Altman DG, Arnaiz JA, Bloom J, Chan A-W, Cronin E, et al. Systematic review of the empirical evidence of study publication bias and outcome reporting bias. *PLoS One*. 2008; 3:e3081. [PubMed: 18769481]
50. GlaxoSmithKline. [on 1 October 2012] Public disclosure of clinical research. *Global Public Policy Issues*. Oct. 2011 Accessed at [www.gsk.com/policies/GSK-on-disclosure-of-clinical-trial-information.pdf](http://www.gsk.com/policies/GSK-on-disclosure-of-clinical-trial-information.pdf)
51. Turner L, Shamseer L, Altman DG, Schulz KF, Moher D. Does use of the CONSORT Statement impact the completeness of reporting of randomised controlled trials published in medical journals? A Cochrane review. *Syst Rev*. 2012; 1:60. [PubMed: 23194585]

*Ann Intern Med*. Author manuscript; available in PMC 2016 November 17.

|                             | Study Period |                 |                |                |                |                |                |          |                |
|-----------------------------|--------------|-----------------|----------------|----------------|----------------|----------------|----------------|----------|----------------|
|                             | Enrollment   | Allocation      | Postallocation |                |                |                |                | Closeout |                |
|                             | Time point*  | -t <sub>1</sub> | 0              | t <sub>1</sub> | t <sub>2</sub> | t <sub>3</sub> | t <sub>4</sub> | etc.     | t <sub>x</sub> |
| Enrollment:                 |              |                 |                |                |                |                |                |          |                |
| Eligibility screen          | X            |                 |                |                |                |                |                |          |                |
| Informed consent            | X            |                 |                |                |                |                |                |          |                |
| [List other procedures]     | X            |                 |                |                |                |                |                |          |                |
| Allocation                  |              | X               |                |                |                |                |                |          |                |
| Interventions:              |              |                 |                |                |                |                |                |          |                |
| [Intervention A]            |              |                 |                | ◆              | —              | ◆              |                |          |                |
| [Intervention B]            |              |                 |                | X              |                | X              |                |          |                |
| [List other study groups]   |              |                 |                | ◆              | —              | ◆              |                |          |                |
| Assessments:                |              |                 |                |                |                |                |                |          |                |
| [List baseline variables]   | X            | X               |                |                |                |                |                |          |                |
| [List outcome variables]    |              |                 |                |                | X              |                | X              | etc.     | X              |
| [List other data variables] |              |                 |                | X              | X              | X              | X              | etc.     | X              |

Recommended content can be displayed using various schematic formats. See SPIRIT 2013 Explanation and Elaboration (31) for examples. This template is copyrighted by the SPIRIT Group and is reproduced with permission. SPIRIT = Standard Protocol Items: Recommendations for Interventional Trials.

\* List specific time points in this row.

**Figure.**  
Example template of recommended content for the schedule of enrollment, interventions, and assessments.

1  
2  
3  
4  
5  
6  
7  
8  
9  
10  
11  
12  
13  
14  
15  
16  
17  
18  
19  
20  
21  
22  
23  
24  
25  
26  
27  
28  
29  
30  
31  
32  
33  
34  
35  
36  
37  
38  
39  
40  
41  
42  
43  
44  
45  
46  
47  
48  
49  
50  
51  
52  
53  
54  
55  
56  
57  
58  
59  
60



**Table 1**

SPIRIT 2013 Checklist: Recommended Items to Address in a Clinical Trial Protocol and Related Documents\*

| Section/Item                              | Item Number | Description                                                                                                                                                                                                                                                                              |
|-------------------------------------------|-------------|------------------------------------------------------------------------------------------------------------------------------------------------------------------------------------------------------------------------------------------------------------------------------------------|
| <b>Administrative information</b>         |             |                                                                                                                                                                                                                                                                                          |
| Title                                     | 1           | Descriptive title identifying the study design, population, interventions, and, if applicable, trial acronym                                                                                                                                                                             |
| Trial registration                        | 2a          | Trial identifier and registry name. If not yet registered, name of intended registry.                                                                                                                                                                                                    |
|                                           | 2b          | All items from the World Health Organization Trial Registration Data Set (Appendix Table, available at <a href="http://www.annals.org">www.annals.org</a> )                                                                                                                              |
| Protocol version                          | 3           | Date and version identifier                                                                                                                                                                                                                                                              |
| Funding                                   | 4           | Sources and types of financial, material, and other support                                                                                                                                                                                                                              |
| Roles and responsibilities                | 5a          | Names, affiliations, and roles of protocol contributors                                                                                                                                                                                                                                  |
|                                           | 5b          | Name and contact information for the trial sponsor                                                                                                                                                                                                                                       |
|                                           | 5c          | Role of study sponsor and funders, if any, in study design; collection, management, analysis, and interpretation of data; writing of the report; and the decision to submit the report for publication, including whether they will have ultimate authority over any of these activities |
|                                           | 5d          | Composition, roles, and responsibilities of the coordinating center, steering committee, end point adjudication committee, data management team, and other individuals or groups overseeing the trial, if applicable (see item 21a for DMC)                                              |
| <b>Introduction</b>                       |             |                                                                                                                                                                                                                                                                                          |
| Background and rationale                  | 6a          | Description of research question and justification for undertaking the trial, including summary of relevant studies (published and unpublished) examining benefits and harms for each intervention                                                                                       |
|                                           | 6b          | Explanation for choice of comparators                                                                                                                                                                                                                                                    |
| Objectives                                | 7           | Specific objectives or hypotheses                                                                                                                                                                                                                                                        |
| Trial design                              | 8           | Description of trial design, including type of trial (e.g., parallel group, crossover, factorial, single group), allocation ratio, and framework (e.g., superiority, equivalence, noninferiority, exploratory)                                                                           |
| <b>Methods</b>                            |             |                                                                                                                                                                                                                                                                                          |
| Participants, interventions, and outcomes |             |                                                                                                                                                                                                                                                                                          |
| Study setting                             | 9           | Description of study settings (e.g., community clinic, academic hospital) and list of countries where data will be collected. Reference to where list of study sites can be obtained                                                                                                     |
| Eligibility criteria                      | 10          | Inclusion and exclusion criteria for participants. If applicable, eligibility criteria for study centers and individuals who will perform the interventions (e.g., surgeons, psychotherapists)                                                                                           |
| Interventions                             | 11a         | Interventions for each group with sufficient detail to allow replication, including how and when they will be administered                                                                                                                                                               |
|                                           | 11b         | Criteria for discontinuing or modifying allocated interventions for a given trial participant (e.g., drug dose change in response to harms, participant request, or improving/worsening disease)                                                                                         |
|                                           | 11c         | Strategies to improve adherence to intervention protocols, and any procedures for monitoring adherence (e.g., drug tablet return, laboratory tests)                                                                                                                                      |

*Ann Intern Med.* Author manuscript; available in PMC 2016 November 17.

| Section/Item                                        | Item Number | Description                                                                                                                                                                                                                                                                                                                                                                                                       |
|-----------------------------------------------------|-------------|-------------------------------------------------------------------------------------------------------------------------------------------------------------------------------------------------------------------------------------------------------------------------------------------------------------------------------------------------------------------------------------------------------------------|
|                                                     | 11d         | Relevant concomitant care and interventions that are permitted or prohibited during the trial                                                                                                                                                                                                                                                                                                                     |
| Outcomes                                            | 12          | Primary, secondary, and other outcomes, including the specific measurement variable (e.g., systolic blood pressure), analysis metric (e.g., change from baseline, final value, time to event), method of aggregation (e.g., median, proportion), and time point for each outcome. Explanation of the clinical relevance of chosen efficacy and harm outcomes is strongly recommended                              |
| Participant timeline                                | 13          | Time schedule of enrollment, interventions (including any run-ins and washouts), assessments, and visits for participants. A schematic diagram is highly recommended (Figure).                                                                                                                                                                                                                                    |
| Sample size                                         | 14          | Estimated number of participants needed to achieve study objectives and how it was determined, including clinical and statistical assumptions supporting any sample size calculations                                                                                                                                                                                                                             |
| Recruitment                                         | 15          | Strategies for achieving adequate participant enrollment to reach target sample size                                                                                                                                                                                                                                                                                                                              |
| Assignment of interventions (for controlled trials) |             |                                                                                                                                                                                                                                                                                                                                                                                                                   |
| Allocation Sequence generation                      | 16a         | Method of generating the allocation sequence (e.g., computer-generated random numbers), and list of any factors for stratification. To reduce predictability of a random sequence, details of any planned restriction (e.g., blocking) should be provided in a separate document that is unavailable to those who enroll participants or assign interventions.                                                    |
| Allocation concealment mechanism                    | 16b         | Mechanism of implementing the allocation sequence (e.g., central telephone; sequentially numbered, opaque, sealed envelopes), describing any steps to conceal the sequence until interventions are assigned                                                                                                                                                                                                       |
| Implementation                                      | 16c         | Who will generate the allocation sequence, who will enroll participants, and who will assign participants to interventions                                                                                                                                                                                                                                                                                        |
| Blinding (masking)                                  | 17a         | Who will be blinded after assignment to interventions (e.g., trial participants, care providers, outcome assessors, data analysts), and how                                                                                                                                                                                                                                                                       |
|                                                     | 17b         | If blinded, circumstances under which unblinding is permissible, and procedure for revealing a participant's allocated intervention during the trial                                                                                                                                                                                                                                                              |
| Data collection, management, and analysis           |             |                                                                                                                                                                                                                                                                                                                                                                                                                   |
| Data collection methods                             | 18a         | Plans for assessment and collection of outcome, baseline, and other trial data, including any related processes to promote data quality (e.g., duplicate measurements, training of assessors) and a description of study instruments (e.g., questionnaires, laboratory tests) along with their reliability and validity, if known. Reference to where data collection forms can be found, if not in the protocol. |
|                                                     | 18b         | Plans to promote participant retention and complete follow-up, including list of any outcome data to be collected for participants who discontinue or deviate from intervention protocols                                                                                                                                                                                                                         |
| Data management                                     | 19          | Plans for data entry, coding, security, and storage, including any related processes to promote data quality (e.g., double data entry; range checks for data values). Reference to where details of data management procedures can be found, if not in the protocol.                                                                                                                                              |
| Statistical methods                                 | 20a         | Statistical methods for analyzing primary and secondary outcomes. Reference to where other details of the statistical analysis plan can be found, if not in the protocol.                                                                                                                                                                                                                                         |
|                                                     | 20b         | Methods for any additional analyses (e.g., subgroup and adjusted analyses)                                                                                                                                                                                                                                                                                                                                        |
|                                                     | 20c         | Definition of analysis population relating to protocol nonadherence (e.g., as-randomized analysis), and any statistical methods to handle missing data (e.g., multiple imputation)                                                                                                                                                                                                                                |

*Ann Intern Med.* Author manuscript; available in PMC 2016 November 17.

| Section/Item                    | Item Number | Description                                                                                                                                                                                                                                                                                                |
|---------------------------------|-------------|------------------------------------------------------------------------------------------------------------------------------------------------------------------------------------------------------------------------------------------------------------------------------------------------------------|
| <b>Monitoring</b>               |             |                                                                                                                                                                                                                                                                                                            |
| Data monitoring                 | 21a         | Composition of DMC; summary of its role and reporting structure; statement of whether it is independent from the sponsor and competing interests; and reference to where further details about its charter can be found, if not in the protocol. Alternatively, an explanation of why a DMC is not needed. |
|                                 | 21b         | Description of any interim analyses and stopping guidelines, including who will have access to these interim results and make the final decision to terminate the trial                                                                                                                                    |
| Harms                           | 22          | Plans for collecting, assessing, reporting, and managing solicited and spontaneously reported adverse events and other unintended effects of trial interventions or trial conduct                                                                                                                          |
| Auditing                        | 23          | Frequency and procedures for auditing trial conduct, if any, and whether the process will be independent from investigators and the sponsor                                                                                                                                                                |
| <b>Ethics and dissemination</b> |             |                                                                                                                                                                                                                                                                                                            |
| Research ethics approval        | 24          | Plans for seeking REC/IRB approval                                                                                                                                                                                                                                                                         |
| Protocol amendments             | 25          | Plans for communicating important protocol modifications (e.g., changes to eligibility criteria, outcomes, analyses) to relevant parties (e.g., investigators, RECs/IRBs, trial participants, trial registries, journals, regulators)                                                                      |
| Consent or assent               | 26a         | Who will obtain informed consent or assent from potential trial participants or authorized surrogates, and how (see item 32)                                                                                                                                                                               |
|                                 | 26b         | Additional consent provisions for collection and use of participant data and biological specimens in ancillary studies, if applicable                                                                                                                                                                      |
| Confidentiality                 | 27          | How personal information about potential and enrolled participants will be collected, shared, and maintained in order to protect confidentiality before, during, and after the trial                                                                                                                       |
| Declaration of interests        | 28          | Financial and other competing interests for principal investigators for the overall trial and each study site                                                                                                                                                                                              |
| Access to data                  | 29          | Statement of who will have access to the final trial data set, and disclosure of contractual agreements that limit such access for investigators                                                                                                                                                           |
| Ancillary and post-trial care   | 30          | Provisions, if any, for ancillary and post-trial care, and for compensation to those who suffer harm from trial participation                                                                                                                                                                              |
| Dissemination policy            | 31a         | Plans for investigators and sponsor to communicate trial results to participants, health care professionals, the public, and other relevant groups (e.g., via publication, reporting in results databases, or other data-sharing arrangements), including any publication restrictions                     |
|                                 | 31b         | Authorship eligibility guidelines and any intended use of professional writers                                                                                                                                                                                                                             |
|                                 | 31c         | Plans, if any, for granting public access to the full protocol, participant-level data set, and statistical code                                                                                                                                                                                           |
| <b>Appendices</b>               |             |                                                                                                                                                                                                                                                                                                            |
| Informed consent materials      | 32          | Model consent form and other related documentation given to participants and authorized surrogates                                                                                                                                                                                                         |
| Biological specimens            | 33          | Plans for collection, laboratory evaluation, and storage of biological specimens for genetic or molecular analysis in the current trial and for future use in ancillary studies, if applicable                                                                                                             |

DMC = data monitoring committee; IRB = institutional review board; REC = research ethics committee; SPIRIT = Standard Protocol Items: Recommendations for Interventional Trials.

*Ann Intern Med.* Author manuscript; available in PMC 2016 November 17.

Chan et al.

Page 15

\* It is strongly recommended that this checklist be read in conjunction with the SPIRIT 2013 Explanation and Elaboration (31) for important clarification on the items. Amendments to the protocol should be tracked and dated. The SPIRIT checklist is copyrighted by the SPIRIT Group and is reproduced with permission.

For peer review only

*Ann Intern Med.* Author manuscript; available in PMC 2016 November 17.

For peer review only - <http://bmjopen.bmj.com/site/about/guidelines.xhtml>

**Table 2**

## Potential Benefits and Proposed Stakeholder Actions for Supporting Adherence to SPIRIT 2013

| Stakeholder                                                                                       | Proposed Actions                                                                                                                                                                                                                                                                             | Potential Benefits                                                                                                                                                                                                                                                                          |
|---------------------------------------------------------------------------------------------------|----------------------------------------------------------------------------------------------------------------------------------------------------------------------------------------------------------------------------------------------------------------------------------------------|---------------------------------------------------------------------------------------------------------------------------------------------------------------------------------------------------------------------------------------------------------------------------------------------|
| Clinical trial groups, investigators, sponsors                                                    | Adopt SPIRIT as standard guidance<br>Use as tool for writing protocols                                                                                                                                                                                                                       | Improved quality, completeness, and consistency of protocol content<br>Enhanced understanding of rationale and issues to consider for key protocol items<br>Increased efficiency of protocol review                                                                                         |
| Research ethics committees/<br>institutional review boards, funding agencies, regulatory agencies | Mandate or encourage adherence to SPIRIT for submitted protocols<br>Use as training tool                                                                                                                                                                                                     | Improved quality, completeness, and consistency of protocol submissions<br>Increased efficiency of review and reduction in queries about protocol requirements                                                                                                                              |
| Educators                                                                                         | Use SPIRIT checklist and explanatory paper as a training tool                                                                                                                                                                                                                                | Enhanced understanding of the rationale and issues to consider for key protocol items                                                                                                                                                                                                       |
| Patients, trial participants, policymakers                                                        | Advocate use of SPIRIT by trial investigators and sponsors                                                                                                                                                                                                                                   | Improved protocol content relevant to transparency, accountability, critical appraisal, and oversight                                                                                                                                                                                       |
| Trial registries                                                                                  | Encourage SPIRIT-based protocols<br>Register full protocols to accompany results disclosure                                                                                                                                                                                                  | Improved quality of registry records<br>Prompt for trialists to update registry record when SPIRIT checklist item 2b (Registration Data Set) is updated<br>Improved quality, completeness, and consistency of protocol content for registries that house full protocols and results         |
| Journal editors and publishers                                                                    | Endorse SPIRIT as standard guidance for published and unpublished protocols<br>Include reference to SPIRIT in instructions for authors<br>Ask that protocols be submitted with manuscripts, circulate them to peer reviewers, and encourage authors to make them available as Web appendices | Improved quality, completeness, and consistency of protocol content<br>Enhanced peer review of trial manuscripts through improved protocol content, which can be used to assess protocol adherence and selective reporting<br>Improved transparency and interpretation of trials by readers |

SPIRIT = Standard Protocol Items: Recommendations for Interventional Trials.

## Appendix Table

## World Health Organization Trial Registration Data Set \*

| Item                                             | Description                                                                                                                                                                                                                                                                                                                                                                                                                                                 |
|--------------------------------------------------|-------------------------------------------------------------------------------------------------------------------------------------------------------------------------------------------------------------------------------------------------------------------------------------------------------------------------------------------------------------------------------------------------------------------------------------------------------------|
| 1. Primary registry and trial-identifying number | Name of primary registry and the unique identifier assigned by the primary registry                                                                                                                                                                                                                                                                                                                                                                         |
| 2. Date of registration in primary registry      | Date when the trial was officially registered in the primary registry                                                                                                                                                                                                                                                                                                                                                                                       |
| 3. Secondary identifying numbers                 | Other identifiers, if any<br>Universal Trial Number<br>Identifiers assigned by the sponsor<br>Other trial registration numbers issued by other registries<br>Identifiers issued by funding bodies, collaborative research groups, regulatory authorities, ethics committees/institutional review boards, etc.                                                                                                                                               |
| 4. Sources of monetary or material support       | Major sources of monetary or material support for the trial (e.g., funding agency, foundation, company, institution)                                                                                                                                                                                                                                                                                                                                        |
| 5. Primary sponsor                               | Person, organization, group, or other legal entity that takes responsibility for initiating and managing a study                                                                                                                                                                                                                                                                                                                                            |
| 6. Secondary sponsor(s)                          | Additional persons, organizations, or other legal persons, if any, who have agreed with the primary sponsor to take on responsibilities of sponsorship                                                                                                                                                                                                                                                                                                      |
| 7. Contact for public queries                    | E-mail address, telephone number, and postal address of the contact who will respond to general queries, including information about current recruitment status                                                                                                                                                                                                                                                                                             |
| 8. Contact for scientific queries                | Name and title, e-mail address, telephone number, postal address, and affiliation of the principal investigator and e-mail address, telephone number, postal address, and affiliation of the contact for scientific queries about the trial (if applicable)                                                                                                                                                                                                 |
| 9. Public title                                  | Title intended for the lay public in easily understood language                                                                                                                                                                                                                                                                                                                                                                                             |
| 10. Scientific title                             | Scientific title of the study as it appears in the protocol submitted for funding and ethical review; include trial acronym, if available                                                                                                                                                                                                                                                                                                                   |
| 11. Countries of recruitment                     | Countries from which participants will be recruited                                                                                                                                                                                                                                                                                                                                                                                                         |
| 12. Health condition(s) or problem(s) studied    | Primary health condition(s) or problem(s) studied (e.g., depression, breast cancer, medication error)                                                                                                                                                                                                                                                                                                                                                       |
| 13. Intervention(s)                              | For each group of the trial, record a brief intervention name plus an intervention description<br>Intervention name: For drugs, use the generic name; for other types of interventions, provide a brief descriptive name<br>Intervention description: Must be sufficiently detailed for it to be possible to distinguish between the groups of a study; for example, interventions involving drugs may include dosage form, dosage, frequency, and duration |
| 14. Key inclusion and exclusion criteria         | Inclusion and exclusion criteria for participant selection, including age and sex                                                                                                                                                                                                                                                                                                                                                                           |
| 15. Study type                                   | Method of allocation (randomized/nonrandomized)<br>Blinding/masking (identify who is blinded)<br>Assignment (e.g., single group, parallel, crossover, factorial)<br>Purpose<br>Phase (if applicable)<br>For randomized trials: Method of sequence generation and allocation concealment                                                                                                                                                                     |
| 16. Date of first enrollment                     | Anticipated or actual date of enrollment of the first participant                                                                                                                                                                                                                                                                                                                                                                                           |
| 17. Target sample size                           | Total number of participants to enroll                                                                                                                                                                                                                                                                                                                                                                                                                      |
| 18. Recruitment status                           | Pending: Participants are not yet being recruited or enrolled at any site<br>Recruiting<br>Suspended: Temporary halt in recruitment and enrollment<br>Complete: Participants are no longer being recruited or enrolled<br>Other                                                                                                                                                                                                                             |

*Ann Intern Med.* Author manuscript; available in PMC 2016 November 17.

| Item                         | Description                                                                                                                                                                                                                                                                                                                                                                                                                                               |
|------------------------------|-----------------------------------------------------------------------------------------------------------------------------------------------------------------------------------------------------------------------------------------------------------------------------------------------------------------------------------------------------------------------------------------------------------------------------------------------------------|
| 19. Primary outcome(s)       | <p>The primary outcome should be the outcome used in sample size calculations or the main outcome used to determine the effects of the intervention</p> <p>For each primary outcome provide:</p> <p style="padding-left: 40px;">Name of the outcome (do not use abbreviations)</p> <p style="padding-left: 40px;">Metric or method of measurement used (be as specific as possible)</p> <p style="padding-left: 40px;">Time point of primary interest</p> |
| 20. Key secondary outcome(s) | <p>As for primary outcomes, for each secondary outcome provide:</p> <p style="padding-left: 40px;">Name of the outcome (do not use abbreviations)</p> <p style="padding-left: 40px;">Metric or method of measurement used (be as specific as possible)</p> <p style="padding-left: 40px;">Time point of interest</p>                                                                                                                                      |

\* Adapted from [www.who.int/ictrp/network/trds/en/index.html](http://www.who.int/ictrp/network/trds/en/index.html).

# BMJ Open

## Intracytoplasmic sperm injection (ICSI) versus conventional in vitro fertilization (IVF) in couples with non-severe male infertility (NSMI-ICSI): protocol for a multi-center randomized controlled trial

|                                 |                                                                                                                                                                                                                                                                                                                                                                                                                                                                                                                                                                                                                                                                                                                                                                                                                                                                                                                                                                                                                                                                                                                                                                                                                                                                      |
|---------------------------------|----------------------------------------------------------------------------------------------------------------------------------------------------------------------------------------------------------------------------------------------------------------------------------------------------------------------------------------------------------------------------------------------------------------------------------------------------------------------------------------------------------------------------------------------------------------------------------------------------------------------------------------------------------------------------------------------------------------------------------------------------------------------------------------------------------------------------------------------------------------------------------------------------------------------------------------------------------------------------------------------------------------------------------------------------------------------------------------------------------------------------------------------------------------------------------------------------------------------------------------------------------------------|
| Journal:                        | <i>BMJ Open</i>                                                                                                                                                                                                                                                                                                                                                                                                                                                                                                                                                                                                                                                                                                                                                                                                                                                                                                                                                                                                                                                                                                                                                                                                                                                      |
| Manuscript ID                   | bmjopen-2019-030366.R1                                                                                                                                                                                                                                                                                                                                                                                                                                                                                                                                                                                                                                                                                                                                                                                                                                                                                                                                                                                                                                                                                                                                                                                                                                               |
| Article Type:                   | Protocol                                                                                                                                                                                                                                                                                                                                                                                                                                                                                                                                                                                                                                                                                                                                                                                                                                                                                                                                                                                                                                                                                                                                                                                                                                                             |
| Date Submitted by the Author:   | 19-Jun-2019                                                                                                                                                                                                                                                                                                                                                                                                                                                                                                                                                                                                                                                                                                                                                                                                                                                                                                                                                                                                                                                                                                                                                                                                                                                          |
| Complete List of Authors:       | Zheng, Danni; Peking University Third Hospital<br>Zeng, Lin; Peking University Third Hospital<br>Yang, Rui; Peking University Third Hospital<br>Lian, Ying; Peking University Third Hospital<br>Zhu, Yimin; Zhejiang University School of Medicine Women's Hospital<br>Liang, Xiaoyan; Sun Yat-sen University Sixth Affiliated Hospital, Reproductive Medicine Center<br>Tang, Li; Kunming Medical University First Affiliated Hospital<br>Wang, Huichun; Haidian Maternal and Child Health Hospital<br>Cao, Yunxia; First Affiliated Hospital of Anhui Medical University<br>Hao, Guimin; Second Hospital of Hebei Medical University<br>Liu, Jianqiao; The Third Affiliated Hospital of Guangzhou Medical University<br>Zhao, Junli; General Hospital of Ningxia Medical University<br>Wang, Rui; Robinson Research Institute and Adelaide Medical School, The University of Adelaide, Adelaide, Australia , ; The University of Adelaide<br>Mol, Ben; School of Medicine, Monash University, Melbourne, Australia, OB/GYN<br>Rong, LI; Peking University Third Hospital, OB & GYN<br>Huang, He-Feng; International Peace Maternity and Child Health Hospital, School of Medicine, Shanghai Jiao Tong University, ;<br>Qiao, Jie; Peking University Third Hospital |
| <b>Primary Subject Heading</b>: | Reproductive medicine                                                                                                                                                                                                                                                                                                                                                                                                                                                                                                                                                                                                                                                                                                                                                                                                                                                                                                                                                                                                                                                                                                                                                                                                                                                |
| Secondary Subject Heading:      | Reproductive medicine                                                                                                                                                                                                                                                                                                                                                                                                                                                                                                                                                                                                                                                                                                                                                                                                                                                                                                                                                                                                                                                                                                                                                                                                                                                |
| Keywords:                       | In vitro fertilization, Intracytoplasmic sperm injection, Non-severe male infertility, Assisted reproductive technology                                                                                                                                                                                                                                                                                                                                                                                                                                                                                                                                                                                                                                                                                                                                                                                                                                                                                                                                                                                                                                                                                                                                              |
|                                 |                                                                                                                                                                                                                                                                                                                                                                                                                                                                                                                                                                                                                                                                                                                                                                                                                                                                                                                                                                                                                                                                                                                                                                                                                                                                      |

SCHOLARONE™  
Manuscripts



1  
2  
3  
4  
5  
6  
7  
8  
9  
10  
11  
12  
13  
14  
15  
16  
17  
18  
19  
20  
21  
22  
23  
24  
25  
26  
27  
28  
29  
30  
31  
32  
33  
34  
35  
36  
37  
38  
39  
40  
41  
42  
43  
44  
45  
46  
47  
48  
49  
50  
51  
52  
53  
54  
55  
56  
57  
58  
59  
60

**Title**

Intracytoplasmic sperm injection (ICSI) versus conventional in vitro fertilization (IVF) in couples with non-severe male infertility (NSMI-ICSI): protocol for a multi-center randomized controlled trial

**Authors:**

Danni Zheng<sup>1,2,3,4,5,6,19</sup>, Lin Zeng<sup>7,19</sup>, Rui Yang<sup>1,2,3,4,5,6,19</sup>, Ying Lian<sup>1,2,3,4,5,6</sup>, Yi-Min Zhu<sup>8</sup>, Xiaoyan Liang<sup>9</sup>, Li Tang<sup>10</sup>, Huichun Wang<sup>11</sup>, Yunxia Cao<sup>12</sup>, Guimin Hao<sup>13</sup>, Jianqiao Liu<sup>14</sup>, Junli Zhao<sup>15</sup>, Rui Wang<sup>16,17</sup>, Ben Willem Mol<sup>17</sup>, Rong Li<sup>1,2,3,4,5,6</sup>, He-Feng Huang<sup>18,20,\*</sup>, and Jie Qiao<sup>1,2,3,4,5,6,20,\*</sup>

<sup>1</sup>Center for Reproductive Medicine, Department of Obstetrics and Gynecology, Peking University Third Hospital, Beijing 100191, China; <sup>2</sup>National Clinical Research Center for Obstetrics and Gynecology, Beijing 100191, China; <sup>3</sup>Key Laboratory of Assisted Reproduction (Peking University), Ministry of Education, Beijing 100191, China; <sup>4</sup>Beijing Key Laboratory of Reproductive Endocrinology and Assisted Reproductive Technology, Beijing 100191, China; <sup>5</sup>Beijing Advanced Innovation Center for Genomics, Beijing 100871, China; <sup>6</sup>Peking-Tsinghua Center for Life Sciences, Peking University, Beijing 100871; <sup>7</sup>Research Center of Clinical Epidemiology, Peking University Third Hospital, Beijing 100191, China; <sup>8</sup>Women's Hospital, Zhejiang University School of Medicine, Hangzhou 310006, China; <sup>9</sup>Reproductive Medicine Center of The Sixth Affiliated Hospital of Sun Yat-Sen University, Guangzhou 510620, China; <sup>10</sup>First Affiliated Hospital of Kunming Medical University, Kunming 650032, China; <sup>11</sup>Haidian Maternal and Child Health Hospital, Beijing 100080, China; <sup>12</sup>First Affiliated Hospital of Anhui Medical University, Hefei 230022, China; <sup>13</sup>The Second Hospital of Hebei Medical University, Shijiazhuang 050000, China; <sup>14</sup>The Third Affiliated Hospital of Guangzhou Medical University, Guangzhou 510150, China; <sup>15</sup>General Hospital of Ningxia Medical University, Yinchuan 750004, China; <sup>16</sup>Robinson Research Institute and Adelaide Medical School, Adelaide, Australia; <sup>17</sup>Department of Obstetrics and Gynaecology, Monash University, Monash Medical Centre, Australia; <sup>18</sup>The International Peace Maternity and Child Health Hospital, School of Medicine, Shanghai Jiao Tong University, Shanghai 200030, China; <sup>19</sup>Co-first authors; <sup>20</sup>Co-corresponding authors.

1  
2  
3  
4  
5  
6  
7  
8  
9  
10  
11  
12  
13  
14  
15  
16  
17  
18  
19  
20  
21  
22  
23  
24  
25  
26  
27  
28  
29  
30  
31  
32  
33  
34  
35  
36  
37  
38  
39  
40  
41  
42  
43  
44  
45  
46  
47  
48  
49  
50  
51  
52  
53  
54  
55  
56  
57  
58  
59  
60

1    **\*Correspondence address**

2    **Jie Qiao:** Center for Reproductive Medicine, Department of Obstetrics and Gynecology, Peking  
3    University Third Hospital, No.49 North Huayuan Road, Haidian District, Beijing 100191, China. Tel:  
4    +86-010-82265080; Fax: +86-010-82266849; E-mail: [jie.qiao@263.net](mailto:jie.qiao@263.net).

5    **He-Feng Huang:** The International Peace Maternity and Child Health Hospital, School of Medicine,  
6    Shanghai Jiao Tong University, 910 Hengshan Road, Shanghai 200030, China. Tel: +86-21-64070434;  
7    Fax: +86-21-64070434; E-mail: [huanghefg@hotmail.com](mailto:huanghefg@hotmail.com).

8  
18  
19  
20  
21  
22  
23  
24  
25  
26  
27  
28  
29  
30  
31  
32  
33  
34  
35  
36  
37  
38  
39  
40  
41  
42  
43  
44  
45  
46  
47  
48  
49  
50  
51  
52  
53  
54  
55  
56  
57  
58  
59  
60

For peer review only

## Abstracts

**Introduction:** Intracytoplasmic sperm injection (ICSI), originally introduced as add-on to in vitro fertilization (IVF) for couples with severe male infertility, is in current clinical practice also used in couples with mild male or even unexplained infertility. However, ICSI has involved unresolved concerns regarding the selection and damage to gametes and the health conditions of the offspring, and it is also labour intensive and therefore more expensive than conventional IVF. High quality well powered randomized clinical trials (RCTs) comparing ICSI and IVF are lacking.

**Methods and analysis:** We propose a multicenter, open-label RCT in ten reproductive medical centers across China. We will study couples with non-severe male infertility (defined as a semen concentrate  $5-15 \times 10^6/\text{ml}$  or sperm with a progressive motility 10-32%) scheduled for their first or second ICSI or IVF cycle, as low fertility rate after fertilization are more frequent in this population, which could lead to controversy about ICSI or conventional IVF for fertilization. On the day of oocyte retrieval, eligible participants are after informed consent be randomized to undergo either ICSI or conventional IVF in a 1:1 treatment ratio. Other standard assisted reproductive treatments are similar and parallel between two groups. Our primary outcome is ongoing pregnancy leading to live birth after the first cycle with embryo transfer. To demonstrate or refute a difference of 7% between ICSI and conventional IVF, we need to include 2,346 women (1,173 in each intervention arm). In addition, we will follow up neonatal outcomes after delivery to identify the influence of ICSI on offspring.

**Ethics and dissemination:** Ethical approval was obtained from Peking University Third Hospital medical science research ethics committee. The findings will be disseminated to the public through conference presentations and peer-reviewed scientific journals.

**Trial registration number:** NCT03298633

### Strengths and limitations of this study

- It's the first randomized controlled clinical trial with a large sample size comparing ICSI and conventional IVF among patients with non-severe male infertility in 10 centers across China.
- This study will provide evidence on whether ICSI or conventional IVF is the better method for fertilization in terms of live birth for non-severe male infertility.
- Range of sperm parameters (semen concentrate  $5-15 \times 10^6/\text{ml}$  or sperm with progressive motility 10-32%) in our study based on the fifth edition of WHO manual will be applicable to couples with non-severe male infertility as many as possible.

1  
2  
3  
4  
5  
6  
7  
8  
9  
10  
11  
12  
13  
14  
15  
16  
17  
18  
19  
20  
21  
22  
23  
24  
25  
26  
27  
28  
29  
30  
31  
32  
33  
34  
35  
36  
37  
38  
39  
40  
41  
42  
43  
44  
45  
46  
47  
48  
49  
50  
51  
52  
53  
54  
55  
56  
57  
58  
59  
60

- 1 ● The sample size and power calculation were focused on the primary outcome of this study, with  
2 the limited power to detect other secondary outcomes.

3 **Keywords:** In vitro fertilization; Intracytoplasmic sperm injection; Non-severe male infertility;  
4 Assisted reproductive technology.

For peer review only

## 1 Introduction

Male infertility is caused by impaired sperm production and function due to different congenital or acquired factors,<sup>1</sup> and has been estimated to be associated with approximately 30% of infertility.<sup>2,3</sup> Assisted reproductive technology (ART) is perceived as a more successful treatment.<sup>4,5</sup> Originally applied in women with tubal damage in 1970s, in-vitro fertilization (IVF) is now acknowledged as an effective treatment for infertility as a major component of ART.<sup>6</sup> However, conventional IVF was much less effective when the semen characteristics were grossly below the standard values according to the WHO fourth edition sperm parameter values and when fertilization rate in previous cycles was low.<sup>7,8</sup>

In 1992,<sup>9</sup> intracytoplasmic sperm injection (ICSI), a technique where a single spermatozoon was injected mechanically into an oocyte in vitro to achieve fertilization, was introduced. While complete fertilization failure was reported up to 50% of the conventional IVF treatments for couples with moderate male infertility (moderate oligozoospermia, asthenozoospermia and teratozoospermia), this occurred in less than 3% of the couples undergoing ICSI.<sup>10-13</sup> Consequently, ICSI has been applied worldwide to treat severe male infertility.<sup>14-16</sup>

The high success rate of ICSI has resulted in its increased use in other populations for whom conventional IVF may be an option, particularly non-male factor infertility. In Europe, in 2012 ICSI was used in 69% of IVF cycles compared to 35% in 1997, while in the Middle East, South-America and South-East Asia, ICSI is performed in 100% of IVF cycles even in some regions.<sup>17,18</sup> In the USA, between 1996 and 2012, the use of ICSI in IVF cycles has increased from 34% to 76%. The greatest increase was documented in non-male factor infertility, where the use of ICSI went from 15% to 67% during this time period.<sup>19</sup>

There are concerns on the increased use of ICSI, as ICSI is time consuming, expensive, and involves unresolved concerns regarding the damage to gametes and the health conditions of the offspring.<sup>20-24</sup> Many studies have indicated the routine use of ICSI in non-male factors infertility was not recommended to improve the clinical outcomes.<sup>25-28</sup> For non-severe male factor infertility, including mild and moderate oligospermia with or without asthenospermia, the fertilization and pregnancy outcome after ICSI compared with conventional IVF is unclear. Studies randomizing sibling oocytes have shown conflicting results. Several studies have documented higher fertilization rates and lower rates of fertilization failure in these couples undergoing ICSI.<sup>29-31</sup> Other studies did not support the

1  
2  
3  
4 1 benefit of ICSI in prevention of total fertilization failure as there were no significant differences  
5  
6 2 between ICSI and conventional IVF in embryo quality, implantation, clinical pregnancy, or live birth  
7  
8 3 rates.<sup>32-34</sup> These studies have limitations such as small sample size, non-randomized couples, or no  
9  
10 4 evaluation of live births. In addition, fewer application of ICSI in China may result in low fertility rate  
11  
12 5 for patients with non-severe male infertility, which would give raise to controversy about ICSI or  
13  
14 6 conventional IVF for fertilization during ART in these population.<sup>35</sup>

15 7 In view of this situation, we plan an adequately powered multi-center randomized controlled clinical  
16  
17 8 trial to assess whether ICSI is more effective than IVF in couples with non-severe male infertility.  
18  
19 9

## 21 10 **Methods and analysis**

### 24 12 *Study design*

26 13 We plan a multi-center, parallel, open-label, randomized controlled clinical trial (1:1 treatment ratio).  
27  
28 14 The flow chart followed SPIRIT checklist showing enrollment, allocation, treatment, and follow-up of  
29  
30 15 participants is presented in [Figure 1](#).<sup>36</sup> In addition, the schedule of enrollment, interventions, and  
31  
32 16 assessments during the study period is shown in [Table 1](#).  
33  
34  
35  
36  
37  
38  
39  
40  
41  
42  
43  
44  
45  
46  
47  
48  
49  
50  
51  
52  
53  
54  
55  
56  
57  
58  
59  
60

**Table 1.** Schedule of enrollment, interventions, and assessments.

|                      | Study Period                    |                                     |                                  |                            |                          |                           |                               |                             |
|----------------------|---------------------------------|-------------------------------------|----------------------------------|----------------------------|--------------------------|---------------------------|-------------------------------|-----------------------------|
|                      | Enrollment                      | Pre-allocation                      | Allocation                       | Post-allocation            |                          |                           |                               | Close-out                   |
| Content              | Screening & Baseline assessment | Controlled ovarian hyperstimulation | Oocyte retrieval & Randomization | Assessment of embryo       | Embryo transfer          | Evaluation of pregnancy   | Follow-up of pregnancy        |                             |
| Time point           | T <sub>0</sub><br>-3 month      | T <sub>1</sub><br>-1 month          | T <sub>2</sub><br>0 month        | T <sub>3</sub><br>1-3 days | T <sub>4</sub><br>3 days | T <sub>5</sub><br>1 month | T <sub>6</sub><br>3-10 months | T <sub>7</sub><br>12 months |
| <b>Enrollment</b>    |                                 |                                     |                                  |                            |                          |                           |                               |                             |
| Eligibility screen   | ×                               | ×                                   | ×                                |                            |                          |                           |                               |                             |
| Informed consent     | ×                               |                                     |                                  |                            |                          |                           |                               |                             |
| Allocation           |                                 |                                     | ×                                |                            |                          |                           |                               |                             |
| <b>Interventions</b> |                                 |                                     |                                  |                            |                          |                           |                               |                             |
| ICSI                 |                                 |                                     | ×                                |                            |                          |                           |                               |                             |
| Conventional IVF     |                                 |                                     | ×                                |                            |                          |                           |                               |                             |
| <b>Assessments</b>   |                                 |                                     |                                  |                            |                          |                           |                               |                             |
| Baseline data        | ×                               |                                     |                                  |                            |                          |                           |                               |                             |
| Laboratory tests     | ×                               | ×                                   | ×                                |                            | ×                        | ×                         | ×                             | ×                           |
| Fertilization        |                                 |                                     |                                  | ×                          |                          |                           |                               |                             |
| Embryo quality       |                                 |                                     |                                  | ×                          |                          |                           |                               |                             |
| Pregnancy tests      |                                 |                                     |                                  |                            |                          | ×                         |                               |                             |
| Pregnancy outcomes   |                                 |                                     |                                  |                            |                          |                           | ×                             | ×                           |
| Fetus information    |                                 |                                     |                                  |                            |                          |                           | ×                             | ×                           |



1  
2  
3  
4  
5  
6  
7  
8  
9  
10  
11  
12  
13  
14  
15  
16  
17  
18  
19  
20  
21  
22  
23  
24  
25  
26  
27  
28  
29  
30  
31  
32  
33  
34  
35  
36  
37  
38  
39  
40  
41  
42  
43  
44  
45  
46

|                     |  |   |   |  |   |   |   |   |
|---------------------|--|---|---|--|---|---|---|---|
| Neonate information |  |   |   |  |   |   | × | × |
| Safety assessment   |  | × | × |  | × | × | × | × |

For peer review only

### ***Study setting***

The study will recruit participants from 10 reproductive medical centers across China: Peking University Third Hospital, International Peace Maternity and Child Health Hospital of Shanghai Jiao Tong University, Women's Hospital of Zhejiang University, The Sixth Affiliated Hospital of Sun Yat-Sen University, First Affiliated Hospital of Kunming Medical University, Haidian Maternal and Child Health Hospital, First Affiliated Hospital of Anhui Medical University, The Second Hospital of Hebei Medical University, The Third Affiliated Hospital of Guangzhou Medical University, and General Hospital of Ningxia Medical University. This trial had been reviewed and approved by the medical science research ethics committee of Peking University Third Hospital: D2017050. The study is registered on ClinicalTrials.gov as NCT03298633. Informed consent will be obtained from each participant before randomization. The researchers will permit trial-related monitoring, audits, regulatory inspections, providing direct access to source data and documents.

An independent data and safety monitoring board (DSMB), with members with clinical and statistical expertise, will monitor the trial progress and interim results at regular intervals.

### ***Eligibility criteria***

Couples presenting to reproductive medical center of the involved hospitals will be screened for following eligibility to be enrolled in our trial.

#### **Inclusion Criteria:**

- Infertile couples scheduled for their first or second IVF/ICSI cycle.
- Male partner has non-severe male infertility, defined as a semen concentrate  $5-15 \times 10^6/\text{ml}$  or sperm with progressive motility (type a+b) 10-32%.
- Women received either gonadotrophin-releasing hormone agonist protocol or gonadotrophin-releasing hormone antagonist protocol as their controlled ovarian hyperstimulation treatment.
- Informed consent obtained.

#### **Exclusion criteria:**

- Couple with a contraindication for IVF or ICSI, including poorly controlled type 1 or type 2 diabetes mellitus; undiagnosed liver disease or dysfunction (based on serum liver enzyme test results); renal disease or abnormal serum renal function; anemia; history of deep venous thrombosis, pulmonary embolus or cerebrovascular accident; uncontrolled hypertension or known symptomatic heart disease; history of (or suspected) cervical carcinoma, endometrial carcinoma or breast carcinoma; and unexplained colporrhagia.
- Couples receiving donor sperm or donor eggs.

- 1
- 2
- 3 1 - Couples undergoing preimplantation genetic testing.
- 4
- 5 2 - Sperm concentration with progressive motility used for insemination  $<0.1 \times 10^6/\text{ml}$  on the day
- 6 of oocyte retrieval.
- 7 3
- 8 4 - Women with 0 oocyte retrieved.
- 9
- 10 5 - Using frozen semen.
- 11
- 12 6 - Poor fertilization in previous cycle ( $\leq 25\%$ ).
- 13

14 7 In this study, couples with various female indications for IVF will be included. The sperm parameters  
15 8 defining non-severe male infertility are evaluated according to the WHO fifth edition sperm parameter  
16 9 values and the sperm parameters are subject to the latest sperm analysis.<sup>37</sup> Participants have the right  
17 10 to decline participation during the whole process, and they can withdraw their consent at any time.  
18 11 Their consent or refusal to consent will not affect their conventional clinical treatments.

### 12 12

### 13 13 **Recruitment**

14 14 Infertile couples who come to the outpatient clinic or medical record of infertile couples who have  
15 15 received COH treatment will be screened by a dedicated research team. Eligible couples will then,  
16 16 before oocyte retrieval, explained by a member of the research team the trial details. After this  
17 17 information, couples will be offered time for consideration to decide whether to participate in the trial.  
18 18 Couples who agree to participate will be asked to sign the consent form in their next scheduled visit.  
19 19 An individual record of all non-recruited patients and reasons for exclusion will be obtained and stored.  
20 20 On the day of oocyte retrieval, semen of patients who have signed consent form will be analysed again  
21 21 for the exclusion criteria. Ineligible patients will be further excluded from our trial, continuing their  
22 22 conventional clinical procedures instead.

### 23 23

### 24 24 **Randomization**

25 25 Randomization and allocation of eligible patients to study groups will be performed on the day of  
26 26 oocyte retrieval. This procedure will be performed by administrative staffs in the trial center not  
27 27 involved in the treatment procedure, using an online trial system with a computer-generated  
28 28 randomization list that allocates couples in a 1:1 ratio to ICSI or IVF, with a variable block size of 4  
29 29 or 6 stratified for center. Stratified permuted block randomization will be centrally controlled.

### 30 30

### 31 31 **Blinding**

32 32 The trial was originally designed and performed as a double-blind trial, in which participants and  
33 33 clinicians/nurses who performed embryo transfer or follow-up, as well as the investigators and  
34 34 assessors will be blinded until the primary outcome occurred. While embryologists who performed

1  
2  
3 1 IVF and ICSI were not blinded. Recruitment was slow due to the double-blind design, as participants  
4 2 wanted to know about their allocation of fertilization method as soon as possible. Therefore, after  
5 3 recruitment of 115 participants, the design was changed to an open-label study: On the day of oocyte  
6 4 retrieval, administrative staff in the IVF laboratory will log into the trial system to randomize and  
7 5 allocate participants to receive either ICSI or IVF. Initially, only embryologists will know the  
8 6 allocation. Participants and clinicians will be informed about the randomized allocation on the day of  
9 7 embryo transfer for participants with fresh embryo transfers and the day of embryo freezing for couples  
10 8 with freeze-all strategies. Prior to these dates, participants and clinicians will still be unaware of  
11 9 randomization allocation.  
12  
13  
14  
15  
16  
17  
18  
19

## 20 11 ***Interventions***

### 21 12 *Controlled ovarian hyperstimulation*

22 13 All couples will receive controlled ovarian hyperstimulation (COH) treatment, which is performed by  
23 14 standard routine according to each study center. The COH treatment includes either gonadotrophin-  
24 15 releasing hormone agonist (GnRH-a) protocol or gonadotrophin-releasing hormone antagonist  
25 16 (GnRH-ant) protocol, and the selection of protocol will be done by physicians. In the GnRH-ant  
26 17 protocol, participants will be injected Gonadotropin (Gonal-F<sup>®</sup> or Pouliquen<sup>®</sup> or HMG<sup>®</sup>) daily from  
27 18 cycle day 2 or 3. When at least one follicle has reached a diameter of 12mm or on day 6 of ovarian  
28 19 stimulation, GnRH-ant (Cetrotide<sup>®</sup> or Ganirelix<sup>®</sup>) will be administered subcutaneously until the trigger  
29 20 day (include the trigger day). For super long GnRH-a protocol, GnRH-a (Alarelin<sup>®</sup> or Triptorelin<sup>®</sup>)  
30 21 will be used in previous menstrual cycle, gonadotropin treatment starts after 28-35 days on GnRH  
31 22 agonist downregulation. For long GnRH-a protocol, pituitary down-regulation will be initiated 7-10  
32 23 days before the menstrual cycle with GnRH-a (Alarelin<sup>®</sup> or Triptorelin<sup>®</sup>). After 10-14 days or on day  
33 24 2 of menstrual cycle, gonadotropin treatment will start. For short GnRH-a protocol, participants will  
34 25 receive Alarelin<sup>®</sup> or Triptorelin<sup>®</sup> for the pituitary down-regulation on day 2/3 of menstrual cycle.  
35 26 Gonadotropin will be used on the same time. For above treatments, menstrual cycle of patient includes  
36 27 spontaneous menstrual cycle, and irregular menstrual cycle by the use of oral contraceptives (OC) or  
37 28 progestins. Before gonadotropin treatment, baseline pelvic ultrasound, as well as basic serum  
38 29 hormones (such as FSH, luteinizing hormone (LH), progesterone (P) and  $\beta$ -hCG) will be measured to  
39 30 confirm the follicle status. The initial dosage gonadotropin (Gonal-F<sup>®</sup> or Pouliquen<sup>®</sup> or HMG<sup>®</sup>) is  
40 31 150-300mg/d and the subsequent dose will be adjusted according to the individual response.  
41 32 Gonadotropin treatment will be continued to the trigger day. After two or more follicles reach a  
42 33 diameter  $\geq 18$  mm, 250ug of hCG (Ovitrelle, 250  $\mu$ g s.c.) will be once injected on trigger day.  
43  
44  
45  
46  
47  
48  
49  
50  
51  
52  
53  
54  
55  
56  
57  
58  
59  
60

### 1 *Oocyte retrieval and preparation*

2 Oocyte retrieval is scheduled for 36h ( $\pm 2$ ) after hCG injection. Routine oocyte pick-up is performed  
3 under transvaginal ultrasound guidance via 17-18G oocyte aspiration needle with use of intravenous  
4 sedation. The retrieved cumulus oocyte complexes (COC) will be placed in culture medium covered  
5 by lightweight paraffin oil and incubated in a humidified 37°C, 5%/6% CO<sub>2</sub> incubator after oocyte  
6 retrieval immediately. Besides, the COCs are incubated for 2-6h before insemination or injection.

### 7 *Semen preparation*

8 Fresh ejaculate semen samples will be obtained by masturbation after 2-7 days' abstention from sexual  
9 intercourse on the day of oocyte retrieval. Sperm concentration and progressive motility are assessed  
10 by computer-assisted semen analysis according to the fifth edition of World Health Organization  
11 (WHO) laboratory standards of human semen and sperm.<sup>37</sup> All semen samples are prepared by  
12 discontinuing density gradient centrifugation or swim-up protocol according to local routines.  
13 Microscopes (200-400 times) will be used to observe whether there are serious abnormalities in sperm  
14 morphology that could lead to fertilization failure, such as globozoospermia.

### 15 *ICSI Group*

16 Oocytes in couples allocated to ICSI, will undergo ICSI which has been previously described.<sup>38</sup> In  
17 short, as the enzymatic removal was done in oocyte preparation, the denuded oocytes are examined to  
18 assess integrity and maturity. Only those oocytes that have extruded the first polar body (metaphase-  
19 II oocytes) will be microinjected.

### 20 *IVF Group*

21 All the oocytes in couples allocated to IVF will be treated by conventional IVF which is adhered to  
22 every study, in which every oocyte will be inseminated by sperm with progressive motility concentrate  
23 0.1-0.2 $\times 10^6$  approximately 39-42h after hCG injection.

### 24 *Assessment of fertilization and embryo quality*

25 Apart from the fertilization procedure, assisted reproductive treatments will be similar for the two  
26 groups. Assessment of fertilization is carried out about 16-18h (day 1) after fertilization. Normal  
27 fertilization was assessed by the presence of two pronuclei and a second polar body. The zygotes were  
28 cultured in cleavage medium to day 3, and the cleavage embryo quality will be observed at 67-69 (day  
29  
30  
31  
32

1  
2  
3 1 3) hours after fertilization. The embryos are scored according to the quality, numbers, size of the  
4 2 blastomeres and the amount of anucleate fragmentation.  
5  
6  
7 3

#### 8 4 *Embryo transfer and luteal support*

9  
10 5 Fresh or frozen-thawed embryo transfer will be decided by physicians according to conditions of  
11 6 patients. Transfer of fresh embryos is the usual practice when fresh embryos are available in all our  
12 7 study centres. In some cases, all embryos may be cryopreserved without a fresh-embryo transfer, most  
13 8 commonly to prevent the ovarian hyperstimulation syndrome. In addition, a freeze-all strategy will be  
14 9 used in the following scenarios: hydrosalpinx, elevated progesterone in hGC day, endometrial factors  
15 10 (endometrial polyps, endometrial cavity fluid and thin endometrium), systematic diseases (stomach-  
16 11 ache, fever or cold), and sudden accident of patients.

17 12 Fresh or frozen-thawed embryo transfer will be performed by physicians in three or five days following  
18 13 the day of oocytes collection for participants receive fresh embryo transfer, and 4-6 day after  
19 14 progesterone initiation for participants undergo frozen thawed embryo transfer (within 6 months after  
20 15 oocyte aspiration). To reduce the risk of high-order multiple pregnancies, the number of embryos  
21 16 replaced will be limited up to two best-quality embryos in all study centres (one embryo would be  
22 17 transferred if there is uterine malformation, history of uterine surgery or cesarean section). Luteal  
23 18 support, as well as embryo freezing and thawing is performed by standard routines at each study center,  
24 19 as we assume that the different protocols will be equally distributed in the interventional and control  
25 20 groups.  
26  
27  
28  
29  
30  
31  
32  
33  
34  
35  
36  
37  
38  
39  
40

#### 41 22 *Follow-up*

42 23 Urine and blood hCG will be measured 14 days after embryo transfer, and positive results indicate  
43 24 biochemical pregnancy. If the gestational sac is observed with ultrasonography on 7 weeks after  
44 25 transfer, clinical pregnancy will be confirmed. Ongoing pregnancy is defined by the presence of a  
45 26 gestational sac with fetal heartbeat after 12 weeks of gestation. In 6 weeks after delivery, the  
46 27 information of pregnancy (pregnancy complications, and fetus information), delivery information  
47 28 (gestational age, delivery mode, placenta abnormality and/or delivery complications), infant  
48 29 information (such as sex, birth weight, birth defect) will be collected by completing forms designed  
49 30 for this visit.  
50  
51  
52  
53  
54  
55  
56

### 57 32 **Outcome measures**

#### 58 33 Primary outcome

1  
2  
3 1 Our primary outcome will be ongoing pregnancy leading to live birth after the first embryo transfer.  
4  
5 2 Live birth will be defined as a delivery of one or more living infants ( $\geq 22$  week's gestation or birth  
6  
7 3 weight more than 1,000g).<sup>17</sup>  
8  
9 4

### 10 5 Secondary outcomes

11  
12 6 For the effectiveness of the treatment, we will record these secondary outcomes in terms of  
13  
14 7 effectiveness:

- 15 8 • Fertilization: defined as number of zygotes with 2PN (per woman randomized and per oocyte  
16 9 retrieved).
- 17 10 • Total fertilization failure: defined as no oocyte formed 2PN in this given cycle.
- 18 11 • Available embryo: defined as number of embryos  $\geq 4$  cells and  $\leq 30\%$  fragmentation (except  
19 12 embryos developed from  $\geq 3$ PN zygotes) on day 3 observation.
- 20 13 • Good quality embryo: defined as number of embryos with  $\geq 6$  cells and  $\leq 10\%$  fragmentation  
21 14 developed from 2PN zygotes on day 3 observation.
- 22 15 • Implantation: defined as the number of gestational sacs observed per embryo transferred.
- 23 16 • Clinical pregnancy: defined as one or more observed gestational sac or definitive clinical signs  
24 17 of pregnancy under ultrasonography at 7 weeks after embryo transfer (including clinically  
25 18 documented ectopic pregnancy).
- 26 19 • Multiple pregnancy: defined as a pregnancy with two or more gestational sacs or positive heart  
27 20 beats at 7 weeks of gestation.
- 28 21 • Ongoing pregnancy: defined as the presence of a gestational sac and fetal heartbeat after 12  
29 22 weeks of gestation.

30  
31  
32  
33  
34  
35  
36  
37  
38  
39  
40  
41  
42 23 For the safety of the treatment, we will record the following treatment complications as secondary  
43  
44 24 outcomes:

- 45 25 • Moderate/severe ovarian hyperstimulation syndrome (OHSS): defined as exaggerated systemic  
46 26 response to ovarian stimulation characterized by a wide spectrum of clinical and laboratory  
47 27 manifestations. It is classified as mild, moderate, or severe according to the degree of  
48 28 abdominal distention, ovarian enlargement, and respiratory, hemodynamic, and metabolic  
49 29 complications.
- 50 30 • Miscarriage: defined as the spontaneous loss of an intra-uterine pregnancy prior to 22  
51 31 completed weeks of gestational age.
- 52 32 • Ectopic pregnancy: defined as the implantation takes place outside the uterine cavity,  
53 33 confirmed by sonography or laparoscopy.

1  
2  
3 1 We will also collect the following obstetric and perinatal complications:  
4

- 5 2 • Gestational diabetes mellitus (GDM).
- 6  
7 3 • Hypertensive disorders of pregnancy (comprising pregnancy induced hypertension (PIH); pre-  
8 4 eclampsia (PET) and eclampsia).
- 9  
10 5 • Antepartum haemorrhage, including placenta previa, placenta accreta and unexplained.
- 11  
12 6 • Preterm birth: defined as birth of a fetus delivered after 28 and before 37 completed weeks of  
13 7 gestational age in participants confirmed ongoing pregnancy.
- 14  
15 8 • Birth weight, including low birth weight (defined as weight < 2500 gm at birth), very low birth  
16 9 weight (defined as < 1500 gm at birth), high birth weight (defined as >4000 gm at birth) and  
17 10 very high birth weight (defined as >4500 gm at birth).
- 18  
19 11 • Large for gestational age (defined as birth weight >90th centile for gestation, based on  
20 12 standardized ethnicity according the charts) and small for gestational age (defined as less than  
21 13 10th centile for gestational age at delivery based on standardized ethnicity according the  
22 14 charts).
- 23  
24 15 • Congenital anomaly (defined as structural or functional disorders that occur during intra-  
25 16 uterine life and can be identified prenatally, at birth or later in life), including trisomy 13, 18,  
26 17 21, neural tube defect, congenital heart disease, cleft lip, excessive numbers of fingers or toes,  
27 18 hydrocephalus. Clinical diagnosis of congenital anomaly is defined according to the  
28 19 International Classification of Diseases, revision 10 (ICD-10) criteria.<sup>39</sup>
- 29  
30 20 • Perinatal mortality (defined as fetal or neonatal death occurring during late pregnancy (at 28  
31 21 completed weeks of gestational age and later), during childbirth, or up to seven completed days  
32 22 after birth)
- 33  
34 23 • Neonatal mortality (defined as death of a live born baby within 28 days of birth).
- 35  
36  
37  
38  
39  
40  
41  
42  
43  
44

## 45 25 **Data management**

46  
47 26 The data collected for the trial will be a mixture of routinely clinical data and information from follow-  
48 27 up, which are verifiable from the medical record. To guarantee the authentic study results, all of our  
49 28 researchers and clinicians are required to master all details about this study. All the characteristics in  
50 29 our study are collected at baseline and follow-up through a standard clinical electronic data collection  
51 30 system (EDC). All participant-identifiable data, such as consent forms, screening and identification  
52 31 logs will be stored in the investigator site files, accessible only to delegated members of the study team.  
53  
54 32 Safety reporting will be in accordance with plan and all adverse events will be recorded and informed  
55 33 DSMB. The DSMB will perform an interim analysis three months after the first 600 randomized  
56  
57  
58  
59  
60



1  
2  
3 1 participants have completed embryo transfer. They will do so using the endpoint ongoing pregnancy,  
4 2 as data on live birth will not be available. Also, the DSMB will oversee the SAE's that have occurred.  
5  
6  
7 3

#### 8 4 **Sample size**

9 5 Among couples with non-severe male infertility, the average live birth rate after IVF during 2014-2015  
10 6 calculated over all study sites was 40% per cycle. Based on other studies within fertility care as well  
11 7 as the discussion by gynaecologist and methodologists, we assumed that the minimal clinical important  
12 8 difference to make ICSI preferable over IVF would be 7%. To demonstrate this difference with two-  
13 9 sided test, 5% alpha-error, 90% statistical power, and taking consideration a dropout of 10%, we will  
14 10 need to enroll 1,173 participants in each group, i.e. a total of 2,346 participants (the ratio between  
15 11 groups will be 1:1). For the interim analysis, we will use the Haybittle-Peto boundary. The significance  
16 12 level for the interim analysis will be 0.001 and for the final analysis 0.05.<sup>40</sup>  
17  
18  
19  
20  
21  
22  
23  
24  
25  
26  
27  
28  
29  
30  
31  
32  
33  
34  
35  
36  
37  
38  
39  
40  
41  
42  
43  
44  
45  
46  
47  
48  
49  
50  
51  
52  
53  
54  
55  
56  
57  
58  
59  
60

#### 25 14 **Statistical analysis**

26 15 For continues variables, parameters normally distributed will be expressed as mean with standard  
27 16 deviation (SD) and compared using student t-test. If the parameters are non-normally distributed, their  
28 17 medians and inter-quantile ranges (IRQs) will be reported, the Mann-Whitney-U test will be utilized  
29 18 to test the distribution of these variables as well. For categorical variables, we will present the  
30 19 proportion between each group and distributions will be compared using Pearson's chi-square test and  
31 20 Fisher's exact test when appropriate. Data analysis of this trial will follow intention-to-treatment, in  
32 21 which all randomized women will be considered in the primary comparison between treatment groups.  
33 22 Per-protocol analysis will be conducted as a secondary analysis in participants who complied with  
34 23 protocol.

42 24 For missing values, a range of clinically plausible scenarios will be used to impute missing values in  
43 25 order to test the robustness of the findings. For losses to follow-up and protocol violations, we will  
44 26 attempt sensitive analyses to explore the effect of these factors on the trial findings. All tests will be  
45 27 two-tailed, and differences with p value <0.001 for interim analysis or p value <0.05 for final analysis  
46 28 are considered statistically significant. All statistical analyses will be performed with the SAS software  
47 29 package V.9.4. The statistical analysis will be done by an independent statistician, overseen by Clinical  
48 30 Epidemiology Research Center of Peking University Third Hospital. The analysis will be described in  
49 31 detail in a statistical analysis plan.  
50  
51  
52  
53  
54  
55  
56  
57  
58  
59  
60

## **Patient and Public Involvement**

This research was done without patient or public involvement. Neither patients nor the public were involved in the development of the research question, study design or implementation of this trial. Patients will not be invited to develop patient relevant outcomes or interpret the results, as well as the writing or editing of final manuscript for readability or accuracy. As interventions in our study are both routine procedures during clinical work, burden of the intervention is assessed by patients themselves.

## **Ethics and dissemination**

This trial had been reviewed and approved by the medical science research ethics committee of Peking University Third Hospital: D2017050. The study is registered on ClinicalTrials.gov as NCT03298633. Informed consent will be obtained from each participant before randomization. The researchers will permit trial-related monitoring, audits, regulatory inspections, providing direct access to source data and documents. There is no additional data available in this study protocol.

## **Trial status**

The recruitment in each study center started in April 2018. The estimated end date of the last recruitment for this study is April 2020.

## **Authors' contributions**

JQ, HH, RL, RW and BWM conceived the study idea. JQ, HH, RL, RY, YL, DZ, participated in the design of the study, recruitment of participants, and drafting of the manuscript. DZ and RY participate in recruitment of participants and assessment of clinical outcomes. JQ, HH, YZ, XL, LT, HW, YC, GH, JL and JZ supervised patient diagnosis and recruitment in each study center. DZ and LZ coordinates of the data collection. LZ oversees data collection will performed data analysis. DZ, LZ, RW and BWM will design the statistical analysis plan and oversee statistical analysis. YL oversees laboratory work among 10 centers. All authors critically reviewed the article and approved the final manuscript.

## **Funding statement**

This study was supported by National Key Research and Development Program of China (2016YFC1000201; 2018YFC1002104) and the National Science Foundation of China (81730038). The study funders had no rule in the study design, implementation, analysis, manuscript, preparation, or decision to submit this article for publication.

1  
2  
3  
4  
5  
6  
7  
8  
9  
10  
11  
12  
13  
14  
15  
16  
17  
18  
19  
20  
21  
22  
23  
24  
25  
26  
27  
28  
29  
30  
31  
32  
33  
34  
35  
36  
37  
38  
39  
40  
41  
42  
43  
44  
45  
46  
47  
48  
49  
50  
51  
52  
53  
54  
55  
56  
57  
58  
59  
60

1 **Competing interests statement**

2 None declared. Completed disclosure of interests form available to view online as supporting  
3 information.

7 **Figure 1. Flow chart followed SPIRIT checklist showing patient enrollment, allocation,  
8 treatment, and follow-up of participants.**

For peer review only

## Reference

1. Krausz C. Male infertility: pathogenesis and clinical diagnosis. *Best Pract Res Clin Endocrinol Metab* 2011;25:271-85.
2. Hull MG, Glazener CM, Kelly NJ, et al. Population study of causes, treatment, and outcome of infertility. *Br Med J (Clin Res Ed)* 1985;291:1693-97.
3. Crosignani PG, Walters DE. Clinical pregnancy and male subfertility; the ESHRE multicentre trial on the treatment of male subfertility. European Society of Human Reproduction and Embryology. *Hum Reprod* 1994;9:1112-18.
4. O'Donovan PA, Vandekerckhove P, Lilford RJ, et al. Treatment of male infertility: is it effective? Review and meta-analyses of published randomized controlled trials. *Hum Reprod* 1993;8:1209-22.
5. Tournaye H. Male factor infertility and ART. *Asian J Androl* 2012;14:103-08.
6. Cohen J, Fehilly CB, Fishel SB, et al. Male infertility successfully treated by in-vitro fertilisation. *Lancet* 1984;1:1239-40.
7. Fishel S, Aslam I, Lisi F, et al. Should ICSI be the treatment of choice for all cases of in-vitro conception? *Hum Reprod* 2000;15:1278-83.
8. Devroey P, Van Steirteghem A. A review of ten years experience of ICSI. *Hum Reprod Update* 2004;10:19-28.
9. Palermo G, Joris H, Devroey P, et al. Pregnancies after intracytoplasmic injection of single spermatozoon into an oocyte. *Lancet* 1992;340:17-18.
10. Coates TE, Check JH, Choe J, et al. An evaluation of couples with failure of fertilization in vitro. *Hum Reprod* 1992;7:978-81.
11. Aboulghar MA, Mansour RT, Serour GI, et al. Management of long-standing unexplained infertility: A prospective study. *Am J Obstet Gynecol* 1999;181:371-75.
12. Fan W, Li SW, Li L, et al. Outcome of conventional IVF and ICSI on sibling oocytes in the case of isolated teratozoospermia. *J Assist Reprod Genet* 2012;29:905-10.
13. Xie BG, Zhu WJ, Huang YH. Outcome of conventional IVF and ICSI on sibling oocytes in moderate ligoasthenozoospermia. *Pak J Med Sci* 2013;29:1221-24.
14. Palermo G, Joris H, Derde MP, et al. Sperm characteristics and outcome of human assisted fertilization by subzonal insemination and intracytoplasmic sperm injection. *Fertil Steril* 1993;59:826-35.
15. Verheyen G, Tournaye H, Staessen C, et al. Controlled comparison of conventional in-vitro fertilization and intracytoplasmic sperm injection in patients with asthenozoospermia. *Hum Reprod* 1999;14:2313-19.
16. Payne D, Flaherty SP, Jeffrey R, et al. Successful treatment of severe male factor infertility in 100 consecutive cycles using intracytoplasmic sperm injection. *Hum Reprod* 1994;9:2051-57.
17. Zegers-Hochschild F, Adamson GD, Dyer S, et al. The International Glossary on Infertility and Fertility Care, 2017. *Fertil Steril* 2017;108:393-406.
18. Dyer S, Chambers GM, de Mouzon J, et al. International Committee for Monitoring Assisted Reproductive Technologies world report: Assisted Reproductive Technology 2008, 2009 and 2010. *Hum Reprod* 2016;31:1588-609.
19. Boulet SL, Mehta A, Kissin DM, et al. Trends in use of and reproductive outcomes associated with intracytoplasmic sperm injection. *JAMA* 2015;313:255-63.
20. Blake M, Garrisi J, Tomkin G, et al. Sperm deposition site during ICSI affects fertilization and development. *Fertil Steril* 2000;73:31-37.
21. Terada Y, Luetjens CM, Sutovsky P, et al. Atypical decondensation of the sperm nucleus, delayed replication of the male genome, and sex chromosome positioning following intracytoplasmic human sperm injection (ICSI) into golden hamster eggs: does ICSI itself introduce chromosomal anomalies? *Fertil Steril* 2000;74:454-60.
22. Miller JE, Smith TT. The effect of intracytoplasmic sperm injection and semen parameters on blastocyst development in vitro. *Hum Reprod* 2001;16:918-24.
23. Lie RT, Lyngstadaas A, Orstavik KH, et al. Birth defects in children conceived by ICSI compared with children conceived by other IVF-methods; a meta-analysis. *Int J Epidemiol* 2005;34:696-701.
24. Wen J, Jiang J, Ding C, et al. Birth defects in children conceived by in vitro fertilization and intracytoplasmic sperm injection: a meta-analysis. *Fertil Steril* 2012;97:1331-37.
25. Eftekhari M, Mohammadian F, Yousefnejad F, et al. Comparison of conventional IVF versus ICSI in non-male factor, normoresponder patients. *Iran J Reprod Med* 2012;10:131-36.
26. Kim JY, Kim JH, Jee BC, et al. Can intracytoplasmic sperm injection prevent total fertilization failure and enhance embryo quality in patients with non-male factor infertility? *Eur J Obstet Gynecol Reprod Biol* 2014;178:188-91.
27. Park JH, Jee BC, Kim SH. Comparison of normal and abnormal fertilization of in vitro-matured human oocyte according to insemination method. *J Obstet Gynaecol Res* 2016;42:417-21.
28. Tannus S, Son WY, Gilman A, et al. The role of intracytoplasmic sperm injection in non-male factor infertility in advanced maternal age. *Hum Reprod* 2017;32:119-24.
29. Pisarska MD, Casson PR, Cisneros PL, et al. Fertilization after standard in vitro fertilization versus intracytoplasmic sperm injection in subfertile males using sibling oocytes. *Fertil Steril* 1999;71:627-32.

- 1  
2  
3 30. Elizur SE, Levron J, Seidman DS, et al. Conventional in vitro fertilization versus intracytoplasmic sperm injection  
4 for sibling oocytes in couples with mild oligoteratoasthenozoospermia and couples with normal sperm. *Fertil Steril*  
5 2004;82:241-43.
- 6 31. van der Westerlaken L, Naaktgeboren N, Verburg H, et al. Conventional in vitro fertilization versus intracytoplasmic  
7 sperm injection in patients with borderline semen: a randomized study using sibling oocytes. *Fertil Steril* 2006;85:395-  
8 400.
- 9 32. Hamberger L, Sjogren A, Lundin K, et al. Microfertilization techniques--the Swedish experience. *Reprod Fertil Dev*  
10 1995;7:263-67, 268.
- 11 33. Bhattacharya S, Hamilton MP, Shaaban M, et al. Conventional in-vitro fertilisation versus intracytoplasmic sperm  
12 injection for the treatment of non-male-factor infertility: a randomised controlled trial. *Lancet* 2001;357:2075-79.
- 13 34. Hershlag A, Paine T, Kvapil G, et al. In vitro fertilization-intracytoplasmic sperm injection split: an insemination  
14 method to prevent fertilization failure. *Fertil Steril* 2002;77:229-32.
- 15 35. Qiao J, Feng HL. Assisted reproductive technology in China: compliance and non-compliance. *Transl Pediatr*  
16 2014;3:91-97.
- 17 36. Chan A, Tetzlaff JM, Altman DG, et al. SPIRIT 2013 Statement: Defining Standard Protocol Items for Clinical Trials.  
18 *Ann Intern Med* 2013;158:200.
- 19 37. WHO Manual for the Examination and Processing of Human Semen. WHO. Geneva, 2010,
- 20 38. Oehninger S, Veeck L, Lanzendorf S, et al. Intracytoplasmic sperm injection: achievement of high pregnancy rates in  
21 couples with severe male factor infertility is dependent primarily upon female and not male factors. *Fertil Steril*  
22 1995;64:977-81.
- 23 39. International Statistical Classification of Diseases and Related Health Problems 10th Revision. WHO. Geneva, 2016,
- 24 40. Blenkinsop A, Parmar MK, Choodari-Oskooei B. Assessing the impact of efficacy stopping rules on the error rates  
25 under the multi-arm multi-stage framework. *Clin Trials* 2019:1496049025.
- 26  
27  
28  
29  
30  
31  
32  
33  
34  
35  
36  
37  
38  
39  
40  
41  
42  
43  
44  
45  
46  
47  
48  
49  
50  
51  
52  
53  
54  
55  
56  
57  
58  
59  
60

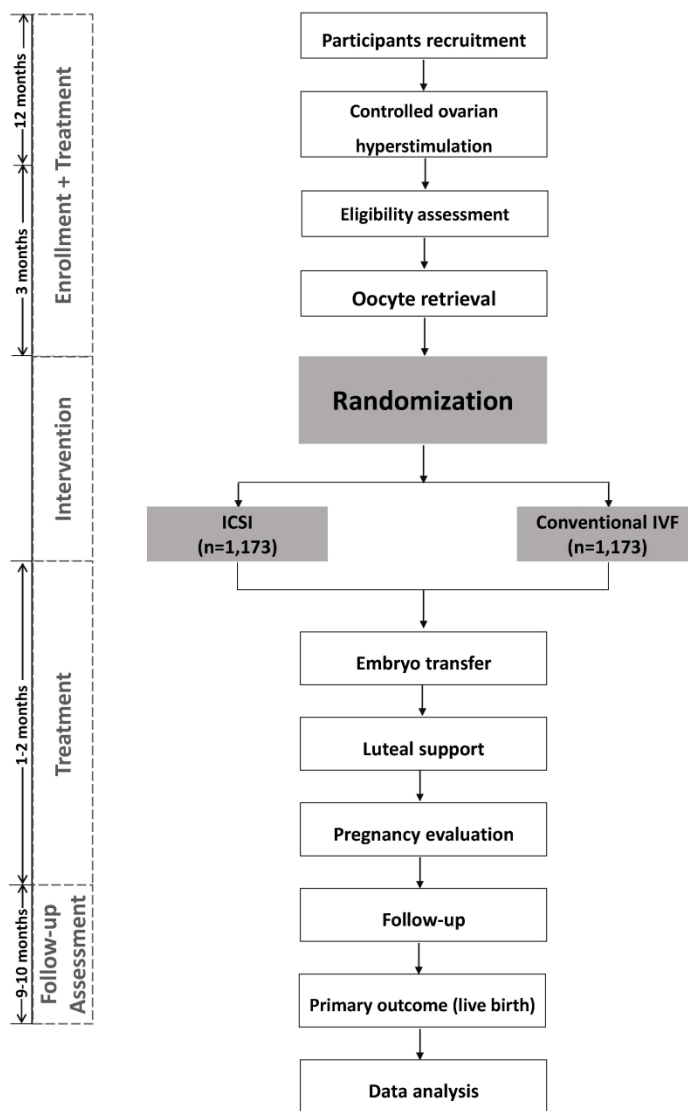

Figure 1. Flow chart followed SPIRIT checklist showing patient enrollment, allocation, treatment, and follow-up of participants.

215x350mm (300 x 300 DPI)

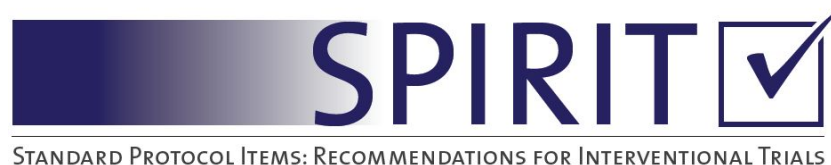

STANDARD PROTOCOL ITEMS: RECOMMENDATIONS FOR INTERVENTIONAL TRIALS

SPIRIT 2013 Checklist: Recommended items to address in a clinical trial protocol and related documents\*

| Section/item                      | Item No | Description                                                                                                                                                                                                                                                                              | Addressed on page number |
|-----------------------------------|---------|------------------------------------------------------------------------------------------------------------------------------------------------------------------------------------------------------------------------------------------------------------------------------------------|--------------------------|
| <b>Administrative information</b> |         |                                                                                                                                                                                                                                                                                          |                          |
| Title                             | 1       | Descriptive title identifying the study design, population, interventions, and, if applicable, trial acronym                                                                                                                                                                             | p1                       |
| Trial registration                | 2a      | Trial identifier and registry name. If not yet registered, name of intended registry                                                                                                                                                                                                     | p3                       |
|                                   | 2b      | All items from the World Health Organization Trial Registration Data Set                                                                                                                                                                                                                 | P3                       |
|                                   | 3       | Date and version identifier                                                                                                                                                                                                                                                              | p1                       |
| Protocol version                  | 3       | Date and version identifier                                                                                                                                                                                                                                                              | p1                       |
| Funding                           | 4       | Sources and types of financial, material, and other support                                                                                                                                                                                                                              | p18                      |
| Roles and responsibilities        | 5a      | Names, affiliations, and roles of protocol contributors                                                                                                                                                                                                                                  | p1                       |
|                                   | 5b      | Name and contact information for the trial sponsor                                                                                                                                                                                                                                       | p1                       |
|                                   | 5c      | Role of study sponsor and funders, if any, in study design; collection, management, analysis, and interpretation of data; writing of the report; and the decision to submit the report for publication, including whether they will have ultimate authority over any of these activities | p3                       |
|                                   | 5d      | Composition, roles, and responsibilities of the coordinating centre, steering committee, endpoint adjudication committee, data management team, and other individuals or groups overseeing the trial, if applicable (see Item 21a for data monitoring committee)                         | p16                      |

1 **Introduction**

2

3 Background and rationale 6a Description of research question and justification for undertaking the trial, including summary of relevant studies (published and unpublished) examining benefits and harms for each intervention p5-6

4

5

6 6b Explanation for choice of comparators p6

7

8 Objectives 7 Specific objectives or hypotheses p6

9

10 Trial design 8 Description of trial design including type of trial (eg, parallel group, crossover, factorial, single group), allocation ratio, and framework (eg, superiority, equivalence, noninferiority, exploratory) p6

11

12

13

14 **Methods: Participants, interventions, and outcomes**

15

16 Study setting 9 Description of study settings (eg, community clinic, academic hospital) and list of countries where data will be collected. Reference to where list of study sites can be obtained p9

17

18

19 Eligibility criteria 10 Inclusion and exclusion criteria for participants. If applicable, eligibility criteria for study centres and individuals who will perform the interventions (eg, surgeons, psychotherapists) p9-10

20

21

22 Interventions 11a Interventions for each group with sufficient detail to allow replication, including how and when they will be administered p11-13

23

24 11b Criteria for discontinuing or modifying allocated interventions for a given trial participant (eg, drug dose change in response to harms, participant request, or improving/worsening disease) p10

25

26 11c Strategies to improve adherence to intervention protocols, and any procedures for monitoring adherence (eg, drug tablet return, laboratory tests) p10

27

28 11d Relevant concomitant care and interventions that are permitted or prohibited during the trial p11-13

29

30 Outcomes 12 Primary, secondary, and other outcomes, including the specific measurement variable (eg, systolic blood pressure), analysis metric (eg, change from baseline, final value, time to event), method of aggregation (eg, median, proportion), and time point for each outcome. Explanation of the clinical relevance of chosen efficacy and harm outcomes is strongly recommended p14-15

31

32

33

34 Participant timeline 13 Time schedule of enrolment, interventions (including any run-ins and washouts), assessments, and visits for participants. A schematic diagram is highly recommended (see Figure) P7-8

35

36

37

38

39

40

41

42

43

44

45

46



1 Sample size 14 Estimated number of participants needed to achieve study objectives and how it was determined, including p16  
 2 clinical and statistical assumptions supporting any sample size calculations

3  
 4 Recruitment 15 Strategies for achieving adequate participant enrolment to reach target sample size p10  
 5

6 **Methods: Assignment of interventions (for controlled trials)**  
 7

8 Allocation:  
 9

10 Sequence 16a Method of generating the allocation sequence (eg, computer-generated random numbers), and list of any p10  
 11 generation factors for stratification. To reduce predictability of a random sequence, details of any planned restriction  
 12 (eg, blocking) should be provided in a separate document that is unavailable to those who enrol participants  
 13 or assign interventions  
 14  
 15

16 Allocation 16b Mechanism of implementing the allocation sequence (eg, central telephone; sequentially numbered, p10  
 17 concealment opaque, sealed envelopes), describing any steps to conceal the sequence until interventions are assigned  
 18 mechanism  
 19

20 Implementation 16c Who will generate the allocation sequence, who will enrol participants, and who will assign participants to p10  
 21 interventions  
 22  
 23

24 Blinding (masking) 17a Who will be blinded after assignment to interventions (eg, trial participants, care providers, outcome p10-11  
 25 assessors, data analysts), and how  
 26

27 17b If blinded, circumstances under which unblinding is permissible, and procedure for revealing a participant's NA  
 28 allocated intervention during the trial  
 29  
 30

31 **Methods: Data collection, management, and analysis**  
 32

33 Data collection 18a Plans for assessment and collection of outcome, baseline, and other trial data, including any related p13  
 34 methods processes to promote data quality (eg, duplicate measurements, training of assessors) and a description of  
 35 study instruments (eg, questionnaires, laboratory tests) along with their reliability and validity, if known.  
 36 Reference to where data collection forms can be found, if not in the protocol  
 37  
 38

39 18b Plans to promote participant retention and complete follow-up, including list of any outcome data to be p13  
 40 collected for participants who discontinue or deviate from intervention protocols  
 41  
 42

|    |                                 |     |                                                                                                                                                                                                                                                                                                                                       |        |
|----|---------------------------------|-----|---------------------------------------------------------------------------------------------------------------------------------------------------------------------------------------------------------------------------------------------------------------------------------------------------------------------------------------|--------|
| 1  | Data management                 | 19  | Plans for data entry, coding, security, and storage, including any related processes to promote data quality (eg, double data entry; range checks for data values). Reference to where details of data management procedures can be found, if not in the protocol                                                                     | p15-16 |
| 2  |                                 |     |                                                                                                                                                                                                                                                                                                                                       |        |
| 3  |                                 |     |                                                                                                                                                                                                                                                                                                                                       |        |
| 4  |                                 |     |                                                                                                                                                                                                                                                                                                                                       |        |
| 5  | Statistical methods             | 20a | Statistical methods for analysing primary and secondary outcomes. Reference to where other details of the statistical analysis plan can be found, if not in the protocol                                                                                                                                                              | p16-17 |
| 6  |                                 |     |                                                                                                                                                                                                                                                                                                                                       |        |
| 7  |                                 |     |                                                                                                                                                                                                                                                                                                                                       |        |
| 8  |                                 | 20b | Methods for any additional analyses (eg, subgroup and adjusted analyses)                                                                                                                                                                                                                                                              | p16-17 |
| 9  |                                 |     |                                                                                                                                                                                                                                                                                                                                       |        |
| 10 |                                 | 20c | Definition of analysis population relating to protocol non-adherence (eg, as randomised analysis), and any statistical methods to handle missing data (eg, multiple imputation)                                                                                                                                                       | p16-17 |
| 11 |                                 |     |                                                                                                                                                                                                                                                                                                                                       |        |
| 12 |                                 |     |                                                                                                                                                                                                                                                                                                                                       |        |
| 13 |                                 |     |                                                                                                                                                                                                                                                                                                                                       |        |
| 14 | <b>Methods: Monitoring</b>      |     |                                                                                                                                                                                                                                                                                                                                       |        |
| 15 |                                 |     |                                                                                                                                                                                                                                                                                                                                       |        |
| 16 | Data monitoring                 | 21a | Composition of data monitoring committee (DMC); summary of its role and reporting structure; statement of whether it is independent from the sponsor and competing interests; and reference to where further details about its charter can be found, if not in the protocol. Alternatively, an explanation of why a DMC is not needed | p15-16 |
| 17 |                                 |     |                                                                                                                                                                                                                                                                                                                                       |        |
| 18 |                                 |     |                                                                                                                                                                                                                                                                                                                                       |        |
| 19 |                                 |     |                                                                                                                                                                                                                                                                                                                                       |        |
| 20 |                                 |     |                                                                                                                                                                                                                                                                                                                                       |        |
| 21 |                                 |     |                                                                                                                                                                                                                                                                                                                                       |        |
| 22 |                                 | 21b | Description of any interim analyses and stopping guidelines, including who will have access to these interim results and make the final decision to terminate the trial                                                                                                                                                               | p16    |
| 23 |                                 |     |                                                                                                                                                                                                                                                                                                                                       |        |
| 24 |                                 |     |                                                                                                                                                                                                                                                                                                                                       |        |
| 25 | Harms                           | 22  | Plans for collecting, assessing, reporting, and managing solicited and spontaneously reported adverse events and other unintended effects of trial interventions or trial conduct                                                                                                                                                     | p16    |
| 26 |                                 |     |                                                                                                                                                                                                                                                                                                                                       |        |
| 27 |                                 |     |                                                                                                                                                                                                                                                                                                                                       |        |
| 28 | Auditing                        | 23  | Frequency and procedures for auditing trial conduct, if any, and whether the process will be independent from investigators and the sponsor                                                                                                                                                                                           | p16    |
| 29 |                                 |     |                                                                                                                                                                                                                                                                                                                                       |        |
| 30 |                                 |     |                                                                                                                                                                                                                                                                                                                                       |        |
| 31 |                                 |     |                                                                                                                                                                                                                                                                                                                                       |        |
| 32 | <b>Ethics and dissemination</b> |     |                                                                                                                                                                                                                                                                                                                                       |        |
| 33 |                                 |     |                                                                                                                                                                                                                                                                                                                                       |        |
| 34 | Research ethics approval        | 24  | Plans for seeking research ethics committee/institutional review board (REC/IRB) approval                                                                                                                                                                                                                                             | p17    |
| 35 |                                 |     |                                                                                                                                                                                                                                                                                                                                       |        |
| 36 |                                 |     |                                                                                                                                                                                                                                                                                                                                       |        |
| 37 | Protocol amendments             | 25  | Plans for communicating important protocol modifications (eg, changes to eligibility criteria, outcomes, analyses) to relevant parties (eg, investigators, REC/IRBs, trial participants, trial registries, journals, regulators)                                                                                                      | p17    |
| 38 |                                 |     |                                                                                                                                                                                                                                                                                                                                       |        |
| 39 |                                 |     |                                                                                                                                                                                                                                                                                                                                       |        |
| 40 |                                 |     |                                                                                                                                                                                                                                                                                                                                       |        |
| 41 |                                 |     |                                                                                                                                                                                                                                                                                                                                       |        |
| 42 |                                 |     |                                                                                                                                                                                                                                                                                                                                       |        |
| 43 |                                 |     |                                                                                                                                                                                                                                                                                                                                       |        |
| 44 |                                 |     |                                                                                                                                                                                                                                                                                                                                       |        |
| 45 |                                 |     |                                                                                                                                                                                                                                                                                                                                       |        |
| 46 |                                 |     |                                                                                                                                                                                                                                                                                                                                       |        |

|    |                               |     |                                                                                                                                                                                                                                                                                     |               |
|----|-------------------------------|-----|-------------------------------------------------------------------------------------------------------------------------------------------------------------------------------------------------------------------------------------------------------------------------------------|---------------|
| 1  | Consent or assent             | 26a | Who will obtain informed consent or assent from potential trial participants or authorised surrogates, and how (see Item 32)                                                                                                                                                        | p17           |
| 2  |                               |     |                                                                                                                                                                                                                                                                                     |               |
| 3  |                               |     |                                                                                                                                                                                                                                                                                     |               |
| 4  |                               | 26b | Additional consent provisions for collection and use of participant data and biological specimens in ancillary studies, if applicable                                                                                                                                               | NA            |
| 5  |                               |     |                                                                                                                                                                                                                                                                                     |               |
| 6  |                               |     |                                                                                                                                                                                                                                                                                     |               |
| 7  | Confidentiality               | 27  | How personal information about potential and enrolled participants will be collected, shared, and maintained in order to protect confidentiality before, during, and after the trial                                                                                                | p17           |
| 8  |                               |     |                                                                                                                                                                                                                                                                                     |               |
| 9  |                               |     |                                                                                                                                                                                                                                                                                     |               |
| 10 | Declaration of interests      | 28  | Financial and other competing interests for principal investigators for the overall trial and each study site                                                                                                                                                                       | p18           |
| 11 |                               |     |                                                                                                                                                                                                                                                                                     |               |
| 12 |                               |     |                                                                                                                                                                                                                                                                                     |               |
| 13 | Access to data                | 29  | Statement of who will have access to the final trial dataset, and disclosure of contractual agreements that limit such access for investigators                                                                                                                                     | p17           |
| 14 |                               |     |                                                                                                                                                                                                                                                                                     |               |
| 15 |                               |     |                                                                                                                                                                                                                                                                                     |               |
| 16 | Ancillary and post-trial care | 30  | Provisions, if any, for ancillary and post-trial care, and for compensation to those who suffer harm from trial participation                                                                                                                                                       | p17           |
| 17 |                               |     |                                                                                                                                                                                                                                                                                     |               |
| 18 |                               |     |                                                                                                                                                                                                                                                                                     |               |
| 19 |                               |     |                                                                                                                                                                                                                                                                                     |               |
| 20 | Dissemination policy          | 31a | Plans for investigators and sponsor to communicate trial results to participants, healthcare professionals, the public, and other relevant groups (eg, via publication, reporting in results databases, or other data sharing arrangements), including any publication restrictions | p17           |
| 21 |                               |     |                                                                                                                                                                                                                                                                                     |               |
| 22 |                               |     |                                                                                                                                                                                                                                                                                     |               |
| 23 |                               |     |                                                                                                                                                                                                                                                                                     |               |
| 24 |                               | 31b | Authorship eligibility guidelines and any intended use of professional writers                                                                                                                                                                                                      | p17           |
| 25 |                               |     |                                                                                                                                                                                                                                                                                     |               |
| 26 |                               | 31c | Plans, if any, for granting public access to the full protocol, participant-level dataset, and statistical code                                                                                                                                                                     | p13           |
| 27 |                               |     |                                                                                                                                                                                                                                                                                     |               |
| 28 |                               |     |                                                                                                                                                                                                                                                                                     |               |
| 29 | <b>Appendices</b>             |     |                                                                                                                                                                                                                                                                                     |               |
| 30 |                               |     |                                                                                                                                                                                                                                                                                     |               |
| 31 | Informed consent materials    | 32  | Model consent form and other related documentation given to participants and authorised surrogates                                                                                                                                                                                  | Supplementary |
| 32 |                               |     |                                                                                                                                                                                                                                                                                     |               |
| 33 |                               |     |                                                                                                                                                                                                                                                                                     |               |
| 34 | Biological specimens          | 33  | Plans for collection, laboratory evaluation, and storage of biological specimens for genetic or molecular analysis in the current trial and for future use in ancillary studies, if applicable                                                                                      | NA            |
| 35 |                               |     |                                                                                                                                                                                                                                                                                     |               |
| 36 |                               |     |                                                                                                                                                                                                                                                                                     |               |

37 \*It is strongly recommended that this checklist be read in conjunction with the SPIRIT 2013 Explanation & Elaboration for important clarification on the items.  
 38 Amendments to the protocol should be tracked and dated. The SPIRIT checklist is copyrighted by the SPIRIT Group under the Creative Commons  
 39 “[Attribution-NonCommercial-NoDerivs 3.0 Unported](https://creativecommons.org/licenses/by-nc-nd/3.0/)” license.  
 40  
 41  
 42
